# Supplementary material for: Significance tests for analyzing gene expression data with small sample sizes
Source: Oxford University Press journal article supplement (doi:10.1093/bioinformatics/btz189), 2019-03-14
Supplement: bioinformatics_35_20_3996_s5.pdf [file bioinformatics_35_20_3996_s5.pdf]

**Supplementary materials for  
Significance tests for analyzing gene expression  
data with small sample sizes**

Insha Ullah, Sudhir Paul, Zhenjie Hong & You-Gan Wang

---

# 1. TABLES OF FALSE POSITIVE RATE FOR THE NORMALLY DISTRIBUTED DATA

TABLE 1

*Empirical false positive rate of the Welch's t-test and the MCT at the nominal levels  $\alpha = .01, .05, .10$ . The samples of size  $m = n = 4, 5, 8, 10, 25$  are drawn from normal populations; the variance ratios  $\rho = \sigma_x^2/\sigma_y^2$  varying from  $2^{-8}$  to  $2^8$  and  $\tau = (\sigma_x^2/m)/(\sigma_y^2/n)$ ; results based on 10,000 simulated samples.*

| $n$ | $\rho$ | $\tau$ | $\alpha = .01$ |       | $\alpha = .05$ |       | $\alpha = .10$ |       |
|-----|--------|--------|----------------|-------|----------------|-------|----------------|-------|
|     |        |        | Welch          | MCT   | Welch          | MCT   | Welch          | MCT   |
| 4   | 1/256  | 1/256  | 0.011          | 0.013 | 0.052          | 0.053 | 0.107          | 0.109 |
|     | 1/64   | 1/64   | 0.015          | 0.019 | 0.054          | 0.057 | 0.100          | 0.102 |
|     | 1/16   | 1/16   | 0.014          | 0.016 | 0.055          | 0.060 | 0.106          | 0.110 |
|     | 1/4    | 1/4    | 0.010          | 0.011 | 0.043          | 0.046 | 0.096          | 0.100 |
|     | 1      | 1      | 0.008          | 0.009 | 0.042          | 0.045 | 0.089          | 0.091 |
|     | 4      | 4      | 0.010          | 0.013 | 0.045          | 0.048 | 0.099          | 0.103 |
|     | 16     | 16     | 0.014          | 0.018 | 0.057          | 0.060 | 0.106          | 0.110 |
|     | 64     | 64     | 0.014          | 0.018 | 0.055          | 0.060 | 0.103          | 0.106 |
|     | 256    | 256    | 0.010          | 0.013 | 0.048          | 0.049 | 0.103          | 0.105 |
|     | 1/256  | 1/256  | 0.010          | 0.011 | 0.051          | 0.052 | 0.103          | 0.103 |
|     | 1/64   | 1/64   | 0.013          | 0.014 | 0.050          | 0.052 | 0.099          | 0.101 |
|     | 1/16   | 1/16   | 0.014          | 0.016 | 0.054          | 0.056 | 0.102          | 0.104 |
| 5   | 1/4    | 1/4    | 0.009          | 0.010 | 0.051          | 0.054 | 0.102          | 0.104 |
|     | 1      | 1      | 0.009          | 0.010 | 0.046          | 0.047 | 0.093          | 0.095 |
|     | 4      | 4      | 0.012          | 0.014 | 0.049          | 0.051 | 0.097          | 0.099 |
|     | 16     | 16     | 0.012          | 0.013 | 0.054          | 0.056 | 0.107          | 0.110 |
|     | 64     | 64     | 0.013          | 0.015 | 0.052          | 0.054 | 0.106          | 0.107 |
|     | 256    | 256    | 0.011          | 0.012 | 0.050          | 0.050 | 0.096          | 0.097 |
|     | 1/256  | 1/256  | 0.009          | 0.009 | 0.053          | 0.052 | 0.101          | 0.100 |
|     | 1/64   | 1/64   | 0.011          | 0.011 | 0.054          | 0.054 | 0.097          | 0.098 |
|     | 1/16   | 1/16   | 0.010          | 0.011 | 0.050          | 0.050 | 0.104          | 0.104 |
|     | 1/4    | 1/4    | 0.010          | 0.010 | 0.051          | 0.052 | 0.102          | 0.103 |
|     | 1      | 1      | 0.009          | 0.009 | 0.050          | 0.050 | 0.104          | 0.104 |
|     | 4      | 4      | 0.010          | 0.010 | 0.053          | 0.054 | 0.096          | 0.097 |
| 8   | 16     | 16     | 0.010          | 0.011 | 0.055          | 0.055 | 0.104          | 0.104 |
|     | 64     | 64     | 0.010          | 0.011 | 0.051          | 0.051 | 0.101          | 0.102 |
|     | 256    | 256    | 0.010          | 0.010 | 0.049          | 0.049 | 0.108          | 0.108 |
|     | 1/256  | 1/256  | 0.012          | 0.012 | 0.051          | 0.051 | 0.101          | 0.101 |
|     | 1/64   | 1/64   | 0.009          | 0.010 | 0.049          | 0.048 | 0.101          | 0.102 |
|     | 1/16   | 1/16   | 0.010          | 0.010 | 0.055          | 0.055 | 0.100          | 0.101 |
|     | 1/4    | 1/4    | 0.010          | 0.010 | 0.050          | 0.051 | 0.095          | 0.096 |
|     | 1      | 1      | 0.008          | 0.008 | 0.052          | 0.051 | 0.098          | 0.099 |
|     | 4      | 4      | 0.011          | 0.011 | 0.047          | 0.047 | 0.099          | 0.100 |
|     | 16     | 16     | 0.013          | 0.014 | 0.052          | 0.053 | 0.102          | 0.103 |
|     | 64     | 64     | 0.009          | 0.009 | 0.046          | 0.047 | 0.103          | 0.103 |
|     | 256    | 256    | 0.010          | 0.010 | 0.048          | 0.048 | 0.096          | 0.096 |
| 10  | 1/256  | 1/256  | 0.010          | 0.010 | 0.047          | 0.047 | 0.102          | 0.102 |
|     | 1/64   | 1/64   | 0.010          | 0.009 | 0.050          | 0.050 | 0.100          | 0.100 |
|     | 1/16   | 1/16   | 0.011          | 0.011 | 0.051          | 0.051 | 0.102          | 0.102 |
|     | 1/4    | 1/4    | 0.011          | 0.010 | 0.048          | 0.048 | 0.102          | 0.103 |
|     | 1      | 1      | 0.010          | 0.010 | 0.047          | 0.048 | 0.102          | 0.102 |
|     | 4      | 4      | 0.012          | 0.012 | 0.052          | 0.052 | 0.098          | 0.099 |
|     | 16     | 16     | 0.010          | 0.010 | 0.052          | 0.053 | 0.101          | 0.100 |
|     | 64     | 64     | 0.010          | 0.010 | 0.049          | 0.049 | 0.100          | 0.100 |
|     | 256    | 256    | 0.010          | 0.010 | 0.049          | 0.050 | 0.097          | 0.098 |

TABLE 2

Empirical false positive rate of the Welch's  $t$ -test and the MCT at the nominal levels  $\alpha = .01, .05, .10$ . The samples are drawn from normal populations;  $(m, n) = (4, 5), (4, 8), (4, 10), (4, 25)$ ; the variance ratios  $\rho = \sigma_x^2/\sigma_y^2$  varying from  $2^{-8}$  to  $2^8$  and  $\tau = (\sigma_x^2/m)/(\sigma_y^2/n)$ ; results based on 10,000 simulated samples.

| $n$   | $\rho$  | $\tau$ | $\alpha = .01$ |       | $\alpha = .05$ |       | $\alpha = .10$ |       |
|-------|---------|--------|----------------|-------|----------------|-------|----------------|-------|
|       |         |        | Welch          | MCT   | Welch          | MCT   | Welch          | MCT   |
| 5     | 1/256   | 4/1280 | 0.012          | 0.013 | 0.053          | 0.054 | 0.108          | 0.108 |
|       | 1/64    | 4/320  | 0.012          | 0.014 | 0.054          | 0.056 | 0.101          | 0.103 |
|       | 1/16    | 4/80   | 0.011          | 0.012 | 0.049          | 0.051 | 0.103          | 0.105 |
|       | 1/4     | 4/20   | 0.008          | 0.008 | 0.048          | 0.051 | 0.094          | 0.096 |
|       | 1       | 4/5    | 0.007          | 0.008 | 0.044          | 0.046 | 0.095          | 0.098 |
|       | 4       | 16/5   | 0.012          | 0.013 | 0.051          | 0.054 | 0.102          | 0.106 |
|       | 16      | 64/5   | 0.014          | 0.018 | 0.057          | 0.062 | 0.101          | 0.107 |
|       | 64      | 256/5  | 0.015          | 0.018 | 0.052          | 0.055 | 0.098          | 0.101 |
|       | 256     | 1024/5 | 0.012          | 0.015 | 0.052          | 0.053 | 0.099          | 0.101 |
|       | 1/256   | 4/2048 | 0.011          | 0.011 | 0.050          | 0.051 | 0.102          | 0.102 |
|       | 1/64    | 4/512  | 0.010          | 0.010 | 0.051          | 0.051 | 0.099          | 0.099 |
|       | 1/16    | 4/128  | 0.010          | 0.010 | 0.048          | 0.049 | 0.101          | 0.102 |
|       | 1/4     | 4/32   | 0.008          | 0.009 | 0.048          | 0.048 | 0.095          | 0.095 |
|       | 1       | 4/8    | 0.010          | 0.011 | 0.050          | 0.052 | 0.097          | 0.100 |
|       | 4       | 16/8   | 0.017          | 0.021 | 0.057          | 0.062 | 0.106          | 0.111 |
|       | 16      | 64/8   | 0.018          | 0.021 | 0.055          | 0.061 | 0.111          | 0.116 |
| 64    | 256/8   | 0.013  | 0.018          | 0.051 | 0.055          | 0.101 | 0.103          |       |
| 256   | 1024/8  | 0.011  | 0.013          | 0.050 | 0.052          | 0.100 | 0.101          |       |
| 1/256 | 4/2560  | 0.010  | 0.010          | 0.052 | 0.052          | 0.100 | 0.101          |       |
| 1/64  | 4/640   | 0.010  | 0.010          | 0.050 | 0.050          | 0.098 | 0.098          |       |
| 1/16  | 4/160   | 0.008  | 0.009          | 0.049 | 0.050          | 0.098 | 0.099          |       |
| 1/4   | 4/40    | 0.009  | 0.009          | 0.043 | 0.043          | 0.099 | 0.101          |       |
| 1     | 4/10    | 0.013  | 0.015          | 0.057 | 0.060          | 0.106 | 0.110          |       |
| 4     | 16/10   | 0.018  | 0.023          | 0.061 | 0.068          | 0.109 | 0.116          |       |
| 16    | 64/10   | 0.016  | 0.023          | 0.053 | 0.059          | 0.102 | 0.107          |       |
| 64    | 256/10  | 0.013  | 0.017          | 0.051 | 0.056          | 0.098 | 0.100          |       |
| 256   | 1024/10 | 0.010  | 0.012          | 0.053 | 0.054          | 0.094 | 0.096          |       |
| 1/256 | 4/6400  | 0.009  | 0.009          | 0.048 | 0.049          | 0.099 | 0.099          |       |
| 1/64  | 4/1600  | 0.010  | 0.009          | 0.052 | 0.052          | 0.102 | 0.102          |       |
| 1/16  | 4/400   | 0.010  | 0.010          | 0.048 | 0.049          | 0.098 | 0.099          |       |
| 1/4   | 4/100   | 0.013  | 0.015          | 0.057 | 0.060          | 0.108 | 0.111          |       |
| 1     | 4/25    | 0.022  | 0.026          | 0.062 | 0.069          | 0.108 | 0.115          |       |
| 4     | 16/25   | 0.020  | 0.026          | 0.058 | 0.066          | 0.106 | 0.112          |       |
| 16    | 64/25   | 0.015  | 0.020          | 0.055 | 0.060          | 0.105 | 0.109          |       |
| 64    | 256/25  | 0.014  | 0.016          | 0.052 | 0.054          | 0.102 | 0.103          |       |
| 256   | 1024/25 | 0.011  | 0.013          | 0.052 | 0.053          | 0.097 | 0.098          |       |

TABLE 3

*Empirical false positive rate of the Welch's t-test and the MCT at the nominal levels*  
 $\alpha = .01, .05, .10$ . The samples are drawn from normal populations;  
 $(m, n) = (5, 4), (5, 8), (5, 10), (5, 25)$ ; the variance ratios  $\rho = \sigma_x^2/\sigma_y^2$  varying from  $2^{-8}$  to  $2^8$  and  
 $\tau = (\sigma_x^2/m)/(\sigma_y^2/n)$ ; results based on 10,000 simulated samples.

| $n$ | $\rho$ | $\tau$  | $\alpha = .01$ |       | $\alpha = .05$ |       | $\alpha = .10$ |       |
|-----|--------|---------|----------------|-------|----------------|-------|----------------|-------|
|     |        |         | Welch          | MCT   | Welch          | MCT   | Welch          | MCT   |
| 4   | 1/256  | 5/1024  | 0.012          | 0.015 | 0.052          | 0.054 | 0.102          | 0.103 |
|     | 1/64   | 5/256   | 0.012          | 0.016 | 0.055          | 0.060 | 0.102          | 0.104 |
|     | 1/16   | 5/64    | 0.014          | 0.017 | 0.060          | 0.064 | 0.111          | 0.115 |
|     | 1/4    | 5/16    | 0.013          | 0.014 | 0.054          | 0.058 | 0.102          | 0.104 |
|     | 1      | 5/4     | 0.008          | 0.008 | 0.045          | 0.047 | 0.093          | 0.095 |
|     | 4      | 20/4    | 0.008          | 0.009 | 0.045          | 0.048 | 0.094          | 0.096 |
|     | 16     | 80/4    | 0.012          | 0.013 | 0.050          | 0.052 | 0.105          | 0.106 |
|     | 64     | 320/4   | 0.011          | 0.013 | 0.055          | 0.057 | 0.099          | 0.101 |
|     | 256    | 1280/4  | 0.013          | 0.014 | 0.050          | 0.050 | 0.104          | 0.105 |
|     | 1/256  | 5/2048  | 0.010          | 0.010 | 0.051          | 0.051 | 0.102          | 0.103 |
| 8   | 1/64   | 5/512   | 0.011          | 0.012 | 0.050          | 0.050 | 0.098          | 0.098 |
|     | 1/16   | 5/128   | 0.011          | 0.011 | 0.048          | 0.047 | 0.096          | 0.098 |
|     | 1/4    | 5/32    | 0.008          | 0.009 | 0.050          | 0.051 | 0.097          | 0.097 |
|     | 1      | 5/8     | 0.009          | 0.010 | 0.046          | 0.047 | 0.096          | 0.099 |
|     | 4      | 20/8    | 0.013          | 0.015 | 0.057          | 0.059 | 0.104          | 0.106 |
|     | 16     | 80/8    | 0.014          | 0.016 | 0.056          | 0.059 | 0.108          | 0.111 |
|     | 64     | 320/8   | 0.011          | 0.013 | 0.048          | 0.050 | 0.109          | 0.110 |
|     | 256    | 1280/8  | 0.012          | 0.013 | 0.053          | 0.054 | 0.097          | 0.097 |
|     | 1/256  | 5/2560  | 0.012          | 0.013 | 0.052          | 0.052 | 0.100          | 0.099 |
|     | 1/64   | 5/640   | 0.010          | 0.010 | 0.053          | 0.053 | 0.102          | 0.104 |
| 10  | 1/16   | 5/160   | 0.012          | 0.012 | 0.051          | 0.052 | 0.095          | 0.096 |
|     | 1/4    | 5/40    | 0.007          | 0.007 | 0.047          | 0.047 | 0.099          | 0.099 |
|     | 1      | 5/10    | 0.009          | 0.011 | 0.053          | 0.055 | 0.102          | 0.105 |
|     | 4      | 20/10   | 0.015          | 0.017 | 0.058          | 0.061 | 0.103          | 0.107 |
|     | 16     | 80/10   | 0.015          | 0.019 | 0.055          | 0.060 | 0.102          | 0.104 |
|     | 64     | 320/10  | 0.014          | 0.016 | 0.046          | 0.049 | 0.098          | 0.099 |
|     | 256    | 1280/10 | 0.010          | 0.011 | 0.048          | 0.048 | 0.102          | 0.103 |
|     | 1/256  | 5/6400  | 0.008          | 0.008 | 0.054          | 0.054 | 0.101          | 0.101 |
|     | 1/64   | 5/1600  | 0.008          | 0.007 | 0.050          | 0.050 | 0.097          | 0.097 |
|     | 1/16   | 5/400   | 0.008          | 0.008 | 0.052          | 0.052 | 0.094          | 0.095 |
| 25  | 1/4    | 5/100   | 0.010          | 0.011 | 0.054          | 0.055 | 0.098          | 0.100 |
|     | 1      | 5/25    | 0.018          | 0.020 | 0.058          | 0.062 | 0.113          | 0.116 |
|     | 4      | 20/25   | 0.013          | 0.017 | 0.056          | 0.061 | 0.105          | 0.108 |
|     | 16     | 80/25   | 0.010          | 0.013 | 0.053          | 0.055 | 0.106          | 0.108 |
|     | 64     | 320/25  | 0.011          | 0.013 | 0.054          | 0.055 | 0.098          | 0.100 |
|     | 256    | 1280/25 | 0.011          | 0.012 | 0.051          | 0.051 | 0.105          | 0.105 |

TABLE 4

*Empirical false positive rate of the Welch's t-test and the MCT at the nominal levels*  
 $\alpha = .01, .05, .10$ . The samples are drawn from normal populations;  
 $(m, n) = (8, 4), (8, 5), (8, 10), (8, 25)$ ; the variance ratios  $\rho = \sigma_x^2/\sigma_y^2$  varying from  $2^{-8}$  to  $2^8$  and  
 $\tau = (\sigma_x^2/m)/(\sigma_y^2/n)$ ; results based on 10,000 simulated samples.

| $n$   | $\rho$  | $\tau$ | $\alpha = .01$ |       | $\alpha = .05$ |       | $\alpha = .10$ |       |
|-------|---------|--------|----------------|-------|----------------|-------|----------------|-------|
|       |         |        | Welch          | MCT   | Welch          | MCT   | Welch          | MCT   |
| 4     | 1/256   | 8/1024 | 0.012          | 0.013 | 0.052          | 0.053 | 0.102          | 0.103 |
|       | 1/64    | 8/256  | 0.012          | 0.017 | 0.051          | 0.056 | 0.100          | 0.104 |
|       | 1/16    | 8/64   | 0.016          | 0.021 | 0.053          | 0.059 | 0.107          | 0.111 |
|       | 1/4     | 8/16   | 0.017          | 0.021 | 0.060          | 0.065 | 0.108          | 0.114 |
|       | 1       | 8/4    | 0.010          | 0.011 | 0.054          | 0.057 | 0.098          | 0.100 |
|       | 4       | 32/4   | 0.008          | 0.009 | 0.043          | 0.044 | 0.096          | 0.098 |
|       | 16      | 128/4  | 0.010          | 0.010 | 0.046          | 0.046 | 0.102          | 0.102 |
|       | 64      | 512/4  | 0.009          | 0.010 | 0.047          | 0.048 | 0.105          | 0.106 |
|       | 256     | 2048/4 | 0.012          | 0.012 | 0.052          | 0.052 | 0.101          | 0.101 |
|       | 1/256   | 8/1280 | 0.010          | 0.011 | 0.054          | 0.053 | 0.100          | 0.101 |
|       | 1/64    | 8/320  | 0.012          | 0.014 | 0.053          | 0.055 | 0.097          | 0.099 |
|       | 1/16    | 8/80   | 0.014          | 0.017 | 0.053          | 0.056 | 0.103          | 0.105 |
|       | 1/4     | 8/20   | 0.014          | 0.016 | 0.050          | 0.052 | 0.108          | 0.111 |
|       | 1       | 8/5    | 0.009          | 0.010 | 0.050          | 0.051 | 0.100          | 0.102 |
|       | 4       | 32/5   | 0.008          | 0.008 | 0.048          | 0.048 | 0.096          | 0.097 |
|       | 16      | 128/5  | 0.010          | 0.010 | 0.052          | 0.053 | 0.100          | 0.100 |
| 64    | 512/5   | 0.010  | 0.010          | 0.049 | 0.050          | 0.097 | 0.098          |       |
| 256   | 2048/5  | 0.011  | 0.011          | 0.050 | 0.050          | 0.098 | 0.098          |       |
| 1/256 | 8/2560  | 0.011  | 0.012          | 0.050 | 0.050          | 0.101 | 0.100          |       |
| 1/64  | 8/640   | 0.010  | 0.010          | 0.055 | 0.055          | 0.103 | 0.103          |       |
| 1/16  | 8/160   | 0.010  | 0.010          | 0.050 | 0.051          | 0.099 | 0.100          |       |
| 1/4   | 8/40    | 0.012  | 0.012          | 0.052 | 0.052          | 0.096 | 0.097          |       |
| 1     | 8/10    | 0.008  | 0.008          | 0.047 | 0.047          | 0.102 | 0.103          |       |
| 4     | 32/10   | 0.012  | 0.012          | 0.051 | 0.052          | 0.105 | 0.105          |       |
| 16    | 128/10  | 0.010  | 0.011          | 0.047 | 0.049          | 0.097 | 0.098          |       |
| 64    | 512/10  | 0.010  | 0.010          | 0.050 | 0.050          | 0.104 | 0.104          |       |
| 256   | 2048/10 | 0.009  | 0.010          | 0.049 | 0.049          | 0.100 | 0.099          |       |
| 1/256 | 8/6400  | 0.010  | 0.010          | 0.051 | 0.051          | 0.108 | 0.108          |       |
| 1/64  | 8/1600  | 0.013  | 0.012          | 0.049 | 0.049          | 0.096 | 0.095          |       |
| 1/16  | 8/400   | 0.010  | 0.010          | 0.051 | 0.052          | 0.103 | 0.103          |       |
| 1/4   | 8/100   | 0.011  | 0.011          | 0.046 | 0.047          | 0.095 | 0.095          |       |
| 1     | 8/25    | 0.011  | 0.012          | 0.051 | 0.053          | 0.099 | 0.099          |       |
| 4     | 32/25   | 0.012  | 0.013          | 0.052 | 0.053          | 0.103 | 0.104          |       |
| 16    | 128/25  | 0.011  | 0.012          | 0.050 | 0.051          | 0.096 | 0.096          |       |
| 64    | 512/25  | 0.011  | 0.011          | 0.050 | 0.050          | 0.102 | 0.102          |       |
| 256   | 2048/25 | 0.011  | 0.011          | 0.051 | 0.051          | 0.103 | 0.104          |       |

TABLE 5

*Empirical false positive rate of the Welch's t-test and the MCT at the nominal levels*  
 $\alpha = .01, .05, .10$ . The samples are drawn from normal populations;  
 $(m, n) = (10, 4), (10, 5), (10, 8), (10, 25)$ ; the variance ratios  $\rho = \sigma_x^2/\sigma_y^2$  varying from  $2^{-8}$  to  $2^8$   
and  $\tau = (\sigma_x^2/m)/(\sigma_y^2/n)$ ; results based on 10,000 simulated samples.

| $n$   | $\rho$ | $\tau$  | $\alpha = .01$ |       | $\alpha = .05$ |       | $\alpha = .10$ |       |
|-------|--------|---------|----------------|-------|----------------|-------|----------------|-------|
|       |        |         | Welch          | MCT   | Welch          | MCT   | Welch          | MCT   |
| 4     | 1/256  | 10/1024 | 0.013          | 0.015 | 0.050          | 0.052 | 0.106          | 0.106 |
|       | 1/64   | 10/256  | 0.011          | 0.015 | 0.051          | 0.056 | 0.096          | 0.099 |
|       | 1/16   | 10/64   | 0.018          | 0.024 | 0.055          | 0.063 | 0.110          | 0.115 |
|       | 1/4    | 10/16   | 0.021          | 0.025 | 0.059          | 0.065 | 0.109          | 0.116 |
|       | 1      | 10/4    | 0.015          | 0.017 | 0.053          | 0.056 | 0.103          | 0.106 |
|       | 4      | 40/4    | 0.009          | 0.010 | 0.045          | 0.046 | 0.091          | 0.092 |
|       | 16     | 160/4   | 0.010          | 0.010 | 0.050          | 0.051 | 0.096          | 0.096 |
|       | 64     | 640/4   | 0.010          | 0.010 | 0.051          | 0.051 | 0.100          | 0.100 |
|       | 256    | 2560/4  | 0.010          | 0.011 | 0.053          | 0.053 | 0.100          | 0.099 |
|       | 1/256  | 10/1280 | 0.009          | 0.010 | 0.051          | 0.052 | 0.100          | 0.100 |
|       | 1/64   | 10/320  | 0.012          | 0.014 | 0.049          | 0.051 | 0.098          | 0.099 |
|       | 1/16   | 10/80   | 0.014          | 0.017 | 0.052          | 0.055 | 0.094          | 0.096 |
|       | 1/4    | 10/20   | 0.013          | 0.015 | 0.061          | 0.065 | 0.100          | 0.103 |
|       | 1      | 10/5    | 0.011          | 0.012 | 0.049          | 0.050 | 0.102          | 0.104 |
|       | 4      | 40/5    | 0.009          | 0.009 | 0.046          | 0.047 | 0.098          | 0.100 |
|       | 5      | 16      | 160/5          | 0.011 | 0.011          | 0.048 | 0.049          | 0.099 |
| 64    |        | 640/5   | 0.010          | 0.010 | 0.048          | 0.049 | 0.100          | 0.102 |
| 256   |        | 2560/5  | 0.009          | 0.010 | 0.052          | 0.052 | 0.100          | 0.100 |
| 1/256 |        | 10/2048 | 0.010          | 0.011 | 0.053          | 0.053 | 0.100          | 0.099 |
| 1/64  |        | 10/512  | 0.011          | 0.011 | 0.049          | 0.049 | 0.101          | 0.102 |
| 1/16  |        | 10/128  | 0.010          | 0.010 | 0.047          | 0.048 | 0.104          | 0.105 |
| 1/4   |        | 10/32   | 0.012          | 0.012 | 0.054          | 0.054 | 0.104          | 0.104 |
| 1     |        | 10/8    | 0.009          | 0.009 | 0.048          | 0.049 | 0.102          | 0.102 |
| 4     |        | 40/10   | 0.012          | 0.013 | 0.049          | 0.049 | 0.104          | 0.104 |
| 16    |        | 160/8   | 0.012          | 0.012 | 0.050          | 0.051 | 0.106          | 0.107 |
| 64    |        | 640/8   | 0.010          | 0.011 | 0.049          | 0.050 | 0.106          | 0.107 |
| 256   |        | 2560/8  | 0.008          | 0.008 | 0.050          | 0.050 | 0.097          | 0.097 |
| 1/256 |        | 10/6400 | 0.011          | 0.011 | 0.050          | 0.051 | 0.095          | 0.095 |
| 1/64  |        | 10/1600 | 0.011          | 0.011 | 0.049          | 0.049 | 0.096          | 0.096 |
| 1/16  |        | 10/400  | 0.010          | 0.011 | 0.048          | 0.049 | 0.098          | 0.099 |
| 1/4   |        | 10/100  | 0.010          | 0.010 | 0.048          | 0.048 | 0.099          | 0.099 |
| 25    | 1      | 10/25   | 0.012          | 0.013 | 0.053          | 0.054 | 0.101          | 0.102 |
|       | 4      | 40/25   | 0.011          | 0.012 | 0.055          | 0.056 | 0.099          | 0.099 |
|       | 16     | 160/25  | 0.010          | 0.011 | 0.049          | 0.049 | 0.099          | 0.100 |
|       | 64     | 640/25  | 0.010          | 0.010 | 0.052          | 0.052 | 0.096          | 0.095 |
|       | 256    | 2560/25 | 0.011          | 0.012 | 0.047          | 0.047 | 0.100          | 0.100 |

TABLE 6

*Empirical false positive rate of the Welch's t-test and the MCT at the nominal levels*  
 $\alpha = .01, .05, .10$ . The samples are drawn from normal populations;  
 $(m, n) = (25, 4), (25, 5), (25, 8), (25, 10)$ ; the variance ratios  $\rho = \sigma_x^2/\sigma_y^2$  varying from  $2^{-8}$  to  $2^8$   
and  $\tau = (\sigma_x^2/m)/(\sigma_y^2/n)$ ; results based on 10,000 simulated samples.

| $n$ | $\rho$ | $\tau$  | $\alpha = .01$ |       | $\alpha = .05$ |       | $\alpha = .10$ |       |
|-----|--------|---------|----------------|-------|----------------|-------|----------------|-------|
|     |        |         | Welch          | MCT   | Welch          | MCT   | Welch          | MCT   |
| 4   | 1/256  | 25/1024 | 0.011          | 0.012 | 0.049          | 0.050 | 0.102          | 0.102 |
|     | 1/64   | 25/256  | 0.011          | 0.014 | 0.050          | 0.052 | 0.101          | 0.102 |
|     | 1/16   | 25/64   | 0.014          | 0.020 | 0.056          | 0.061 | 0.104          | 0.108 |
|     | 1/4    | 25/16   | 0.021          | 0.028 | 0.060          | 0.066 | 0.104          | 0.111 |
|     | 1      | 25/4    | 0.019          | 0.026 | 0.059          | 0.066 | 0.106          | 0.112 |
|     | 4      | 100/4   | 0.014          | 0.015 | 0.051          | 0.054 | 0.102          | 0.106 |
|     | 16     | 400/4   | 0.012          | 0.013 | 0.049          | 0.049 | 0.100          | 0.102 |
|     | 64     | 1600/4  | 0.011          | 0.011 | 0.045          | 0.046 | 0.104          | 0.104 |
|     | 256    | 6400/4  | 0.010          | 0.010 | 0.053          | 0.053 | 0.102          | 0.101 |
|     | 1/256  | 25/1280 | 0.009          | 0.010 | 0.048          | 0.048 | 0.098          | 0.098 |
| 5   | 1/64   | 25/320  | 0.012          | 0.012 | 0.052          | 0.053 | 0.101          | 0.101 |
|     | 1/16   | 25/80   | 0.014          | 0.017 | 0.054          | 0.056 | 0.100          | 0.102 |
|     | 1/4    | 25/20   | 0.016          | 0.019 | 0.056          | 0.060 | 0.104          | 0.107 |
|     | 1      | 25/5    | 0.016          | 0.019 | 0.055          | 0.060 | 0.109          | 0.114 |
|     | 4      | 100/5   | 0.011          | 0.012 | 0.050          | 0.052 | 0.102          | 0.103 |
|     | 16     | 400/5   | 0.010          | 0.010 | 0.049          | 0.049 | 0.102          | 0.103 |
|     | 64     | 1600/5  | 0.010          | 0.009 | 0.053          | 0.053 | 0.098          | 0.098 |
|     | 256    | 6400/5  | 0.010          | 0.010 | 0.050          | 0.050 | 0.096          | 0.097 |
|     | 1/256  | 25/2048 | 0.013          | 0.013 | 0.048          | 0.047 | 0.100          | 0.100 |
|     | 1/64   | 25/512  | 0.011          | 0.011 | 0.046          | 0.047 | 0.097          | 0.097 |
| 8   | 1/16   | 25/128  | 0.010          | 0.011 | 0.050          | 0.050 | 0.100          | 0.101 |
|     | 1/4    | 25/32   | 0.011          | 0.012 | 0.055          | 0.056 | 0.093          | 0.094 |
|     | 1      | 25/8    | 0.012          | 0.013 | 0.055          | 0.056 | 0.101          | 0.103 |
|     | 4      | 100/10  | 0.010          | 0.010 | 0.049          | 0.050 | 0.102          | 0.102 |
|     | 16     | 400/8   | 0.009          | 0.009 | 0.048          | 0.048 | 0.096          | 0.096 |
|     | 64     | 1600/8  | 0.009          | 0.010 | 0.050          | 0.051 | 0.101          | 0.102 |
|     | 256    | 6400/8  | 0.009          | 0.009 | 0.052          | 0.052 | 0.103          | 0.103 |
|     | 1/256  | 25/2560 | 0.009          | 0.009 | 0.051          | 0.051 | 0.102          | 0.102 |
|     | 1/64   | 25/640  | 0.010          | 0.010 | 0.052          | 0.052 | 0.097          | 0.097 |
|     | 1/16   | 25/160  | 0.009          | 0.009 | 0.048          | 0.048 | 0.101          | 0.102 |
| 10  | 1/4    | 25/40   | 0.012          | 0.012 | 0.050          | 0.052 | 0.103          | 0.104 |
|     | 1      | 25/10   | 0.014          | 0.014 | 0.048          | 0.050 | 0.098          | 0.098 |
|     | 4      | 100/10  | 0.010          | 0.010 | 0.050          | 0.050 | 0.105          | 0.105 |
|     | 16     | 400/10  | 0.008          | 0.009 | 0.050          | 0.050 | 0.098          | 0.098 |
|     | 64     | 1600/10 | 0.010          | 0.010 | 0.049          | 0.049 | 0.102          | 0.102 |
|     | 256    | 6400/10 | 0.009          | 0.009 | 0.050          | 0.050 | 0.106          | 0.107 |

## 2. POWER TABLES FOR THE NORMALLY DISTRIBUTED DATA

TABLE 7

Empirical power of the Welch's  $t$ -test and the MCT at the nominal levels  $\alpha = .05$ . The samples of size  $m = n = 4, 5, 8, 10, 25$  are drawn from normal populations; the variance ratios  $\rho = \sigma_x^2/\sigma_y^2$  varying from  $2^{-8}$  to  $2^8$  and  $\tau = (\sigma_x^2/m)/(\sigma_y^2/n)$ ; the deviation from equality of means is obtained by  $\delta = \eta\sqrt{\sigma_x^2/m + \sigma_y^2/n}$  with  $\eta = 1, 2, 3$ ; results based on 10,000 simulated samples.

| $n$ | $\rho$ | $\tau$ | $\eta = 1$ |       | $\eta = 2$ |       | $\eta = 3$ |       |
|-----|--------|--------|------------|-------|------------|-------|------------|-------|
|     |        |        | Welch      | MCT   | Welch      | MCT   | Welch      | MCT   |
| 4   | 1/256  | 1/256  | 0.112      | 0.116 | 0.292      | 0.296 | 0.542      | 0.547 |
|     | 1/64   | 1/64   | 0.116      | 0.123 | 0.297      | 0.309 | 0.560      | 0.571 |
|     | 1/16   | 1/16   | 0.125      | 0.135 | 0.320      | 0.336 | 0.580      | 0.598 |
|     | 1/4    | 1/4    | 0.123      | 0.129 | 0.350      | 0.366 | 0.625      | 0.646 |
|     | 1      | 1      | 0.111      | 0.117 | 0.334      | 0.347 | 0.659      | 0.673 |
|     | 4      | 4      | 0.122      | 0.128 | 0.336      | 0.349 | 0.629      | 0.650 |
|     | 16     | 16     | 0.131      | 0.138 | 0.315      | 0.334 | 0.576      | 0.599 |
|     | 64     | 64     | 0.125      | 0.131 | 0.305      | 0.316 | 0.548      | 0.562 |
|     | 256    | 256    | 0.112      | 0.115 | 0.289      | 0.294 | 0.539      | 0.542 |
|     | 1/256  | 1/256  | 0.124      | 0.125 | 0.344      | 0.346 | 0.618      | 0.618 |
| 5   | 1/64   | 1/64   | 0.130      | 0.134 | 0.346      | 0.350 | 0.626      | 0.632 |
|     | 1/16   | 1/16   | 0.132      | 0.138 | 0.350      | 0.360 | 0.650      | 0.660 |
|     | 1/4    | 1/4    | 0.140      | 0.144 | 0.387      | 0.396 | 0.697      | 0.707 |
|     | 1      | 1      | 0.126      | 0.130 | 0.396      | 0.402 | 0.724      | 0.732 |
|     | 4      | 4      | 0.136      | 0.140 | 0.377      | 0.387 | 0.689      | 0.700 |
|     | 16     | 16     | 0.135      | 0.140 | 0.365      | 0.376 | 0.648      | 0.657 |
|     | 64     | 64     | 0.122      | 0.124 | 0.345      | 0.350 | 0.624      | 0.628 |
|     | 256    | 256    | 0.125      | 0.127 | 0.346      | 0.347 | 0.619      | 0.623 |
|     | 1/256  | 1/256  | 0.136      | 0.135 | 0.404      | 0.405 | 0.728      | 0.728 |
|     | 1/64   | 1/64   | 0.144      | 0.145 | 0.414      | 0.414 | 0.741      | 0.742 |
| 8   | 1/16   | 1/16   | 0.147      | 0.149 | 0.420      | 0.424 | 0.746      | 0.747 |
|     | 1/4    | 1/4    | 0.155      | 0.156 | 0.439      | 0.443 | 0.772      | 0.776 |
|     | 1      | 1      | 0.149      | 0.150 | 0.464      | 0.464 | 0.795      | 0.796 |
|     | 4      | 4      | 0.148      | 0.151 | 0.438      | 0.439 | 0.771      | 0.773 |
|     | 16     | 16     | 0.140      | 0.143 | 0.422      | 0.424 | 0.747      | 0.750 |
|     | 64     | 64     | 0.143      | 0.144 | 0.416      | 0.417 | 0.740      | 0.739 |
|     | 256    | 256    | 0.142      | 0.142 | 0.401      | 0.401 | 0.731      | 0.731 |
|     | 1/256  | 1/256  | 0.143      | 0.143 | 0.427      | 0.426 | 0.752      | 0.752 |
|     | 1/64   | 1/64   | 0.151      | 0.152 | 0.426      | 0.428 | 0.758      | 0.759 |
|     | 1/16   | 1/16   | 0.148      | 0.150 | 0.435      | 0.437 | 0.771      | 0.772 |
| 10  | 1/4    | 1/4    | 0.154      | 0.157 | 0.462      | 0.463 | 0.797      | 0.799 |
|     | 1      | 1      | 0.157      | 0.157 | 0.459      | 0.460 | 0.799      | 0.800 |
|     | 4      | 4      | 0.154      | 0.155 | 0.460      | 0.461 | 0.789      | 0.790 |
|     | 16     | 16     | 0.150      | 0.151 | 0.447      | 0.448 | 0.775      | 0.776 |
|     | 64     | 64     | 0.152      | 0.154 | 0.446      | 0.446 | 0.767      | 0.767 |
|     | 256    | 256    | 0.148      | 0.148 | 0.427      | 0.427 | 0.764      | 0.764 |
|     | 1/256  | 1/256  | 0.159      | 0.158 | 0.484      | 0.483 | 0.823      | 0.822 |
|     | 1/64   | 1/64   | 0.161      | 0.161 | 0.482      | 0.481 | 0.822      | 0.821 |
|     | 1/16   | 1/16   | 0.160      | 0.160 | 0.488      | 0.487 | 0.827      | 0.827 |
|     | 1/4    | 1/4    | 0.162      | 0.163 | 0.496      | 0.496 | 0.824      | 0.825 |
| 25  | 1      | 1      | 0.166      | 0.166 | 0.507      | 0.506 | 0.831      | 0.831 |
|     | 4      | 4      | 0.165      | 0.166 | 0.498      | 0.499 | 0.840      | 0.841 |
|     | 16     | 16     | 0.163      | 0.163 | 0.483      | 0.483 | 0.820      | 0.820 |
|     | 64     | 64     | 0.163      | 0.164 | 0.488      | 0.488 | 0.815      | 0.815 |
|     | 256    | 256    | 0.164      | 0.164 | 0.490      | 0.491 | 0.820      | 0.820 |



TABLE 8

Empirical power of the Welch's  $t$ -test and the MCT at the nominal levels  $\alpha = .05$ . The samples are drawn from normal populations;  $(m, n) = (4, 5), (4, 8), (4, 10), (4, 25)$ ; the variance ratios  $\rho = \sigma_x^2/\sigma_y^2$  varying from  $2^{-8}$  to  $2^8$  and  $\tau = (\sigma_x^2/m)/(\sigma_y^2/n)$ ; the deviation from equality of means is obtained by  $\delta = \eta\sqrt{\sigma_x^2/m + \sigma_y^2/n}$  with  $\eta = 1, 2, 3$ ; results based on 10,000 simulated samples.

| $n$ | $\rho$ | $\tau$  | $\eta = 1$ |       | $\eta = 2$ |       | $\eta = 3$ |       |
|-----|--------|---------|------------|-------|------------|-------|------------|-------|
|     |        |         | Welch      | MCT   | Welch      | MCT   | Welch      | MCT   |
| 5   | 1/256  | 4/1280  | 0.121      | 0.123 | 0.343      | 0.345 | 0.623      | 0.625 |
|     | 1/64   | 4/320   | 0.126      | 0.129 | 0.352      | 0.358 | 0.632      | 0.637 |
|     | 1/16   | 4/80    | 0.137      | 0.142 | 0.357      | 0.367 | 0.654      | 0.664 |
|     | 1/4    | 4/20    | 0.133      | 0.137 | 0.365      | 0.372 | 0.680      | 0.690 |
|     | 1      | 4/5     | 0.122      | 0.128 | 0.378      | 0.389 | 0.690      | 0.702 |
|     | 4      | 16/5    | 0.134      | 0.143 | 0.353      | 0.373 | 0.622      | 0.645 |
|     | 16     | 64/5    | 0.123      | 0.132 | 0.325      | 0.343 | 0.568      | 0.590 |
|     | 64     | 256/5   | 0.122      | 0.128 | 0.296      | 0.306 | 0.545      | 0.558 |
|     | 256    | 1024/5  | 0.117      | 0.120 | 0.285      | 0.288 | 0.531      | 0.535 |
|     | 1/256  | 4/2048  | 0.142      | 0.142 | 0.409      | 0.410 | 0.730      | 0.731 |
|     | 1/64   | 4/512   | 0.142      | 0.142 | 0.418      | 0.421 | 0.743      | 0.743 |
|     | 1/16   | 4/128   | 0.143      | 0.144 | 0.426      | 0.427 | 0.756      | 0.758 |
| 8   | 1/4    | 4/32    | 0.136      | 0.138 | 0.418      | 0.422 | 0.755      | 0.760 |
|     | 1      | 4/8     | 0.142      | 0.148 | 0.381      | 0.399 | 0.695      | 0.717 |
|     | 4      | 16/8    | 0.138      | 0.150 | 0.341      | 0.366 | 0.611      | 0.644 |
|     | 16     | 64/8    | 0.129      | 0.140 | 0.316      | 0.335 | 0.559      | 0.580 |
|     | 64     | 256/8   | 0.112      | 0.119 | 0.297      | 0.306 | 0.544      | 0.551 |
|     | 256    | 1024/8  | 0.115      | 0.117 | 0.286      | 0.290 | 0.532      | 0.536 |
|     | 1/256  | 4/2560  | 0.144      | 0.144 | 0.434      | 0.433 | 0.761      | 0.760 |
|     | 1/64   | 4/640   | 0.152      | 0.153 | 0.428      | 0.430 | 0.767      | 0.768 |
|     | 1/16   | 4/160   | 0.144      | 0.144 | 0.440      | 0.441 | 0.770      | 0.771 |
|     | 1/4    | 4/40    | 0.136      | 0.140 | 0.424      | 0.432 | 0.760      | 0.765 |
|     | 1      | 4/10    | 0.140      | 0.148 | 0.399      | 0.421 | 0.682      | 0.706 |
|     | 4      | 16/10   | 0.137      | 0.151 | 0.338      | 0.364 | 0.594      | 0.628 |
| 10  | 16     | 64/10   | 0.124      | 0.134 | 0.313      | 0.333 | 0.545      | 0.564 |
|     | 64     | 256/10  | 0.119      | 0.124 | 0.293      | 0.301 | 0.542      | 0.550 |
|     | 256    | 1024/10 | 0.109      | 0.112 | 0.295      | 0.299 | 0.536      | 0.539 |
|     | 1/256  | 4/6400  | 0.156      | 0.156 | 0.494      | 0.494 | 0.824      | 0.824 |
|     | 1/64   | 4/1600  | 0.158      | 0.158 | 0.488      | 0.488 | 0.814      | 0.814 |
|     | 1/16   | 4/400   | 0.161      | 0.164 | 0.468      | 0.472 | 0.797      | 0.803 |
|     | 1/4    | 4/100   | 0.155      | 0.162 | 0.424      | 0.446 | 0.732      | 0.754 |
|     | 1      | 4/25    | 0.146      | 0.161 | 0.367      | 0.398 | 0.623      | 0.664 |
|     | 4      | 16/25   | 0.128      | 0.140 | 0.322      | 0.348 | 0.566      | 0.595 |
|     | 16     | 64/25   | 0.120      | 0.128 | 0.303      | 0.314 | 0.545      | 0.556 |
|     | 64     | 256/25  | 0.112      | 0.114 | 0.281      | 0.286 | 0.544      | 0.548 |
|     | 256    | 1024/25 | 0.115      | 0.115 | 0.286      | 0.286 | 0.540      | 0.542 |

TABLE 9

Empirical power of the Welch's  $t$ -test and the MCT at the nominal levels  $\alpha = .05$ . The samples are drawn from normal populations;  $(m, n) = (5, 4), (5, 8), (5, 10), (5, 25)$ ; the variance ratios  $\rho = \sigma_x^2/\sigma_y^2$  varying from  $2^{-8}$  to  $2^8$  and  $\tau = (\sigma_x^2/m)/(\sigma_y^2/n)$ ; the deviation from equality of means is obtained by  $\delta = \eta\sqrt{\sigma_x^2/m + \sigma_y^2/n}$  with  $\eta = 1, 2, 3$ ; results based on 10,000 simulated samples.

| $n$ | $\rho$ | $\tau$  | $\eta = 1$ |       | $\eta = 2$ |       | $\eta = 3$ |       |
|-----|--------|---------|------------|-------|------------|-------|------------|-------|
|     |        |         | Welch      | MCT   | Welch      | MCT   | Welch      | MCT   |
| 4   | 1/256  | 5/1024  | 0.108      | 0.113 | 0.289      | 0.292 | 0.538      | 0.542 |
|     | 1/64   | 5/256   | 0.123      | 0.129 | 0.300      | 0.310 | 0.546      | 0.558 |
|     | 1/16   | 5/64    | 0.129      | 0.139 | 0.313      | 0.333 | 0.566      | 0.587 |
|     | 1/4    | 5/16    | 0.131      | 0.140 | 0.350      | 0.371 | 0.623      | 0.648 |
|     | 1      | 5/4     | 0.131      | 0.135 | 0.368      | 0.378 | 0.688      | 0.700 |
|     | 4      | 20/4    | 0.122      | 0.126 | 0.373      | 0.382 | 0.688      | 0.697 |
|     | 16     | 80/4    | 0.125      | 0.129 | 0.359      | 0.369 | 0.644      | 0.656 |
|     | 64     | 320/4   | 0.125      | 0.129 | 0.338      | 0.345 | 0.627      | 0.632 |
|     | 256    | 1280/4  | 0.120      | 0.122 | 0.331      | 0.334 | 0.625      | 0.627 |
|     | 1/256  | 5/2048  | 0.138      | 0.139 | 0.417      | 0.418 | 0.734      | 0.734 |
|     | 1/64   | 5/512   | 0.138      | 0.139 | 0.416      | 0.421 | 0.742      | 0.742 |
|     | 1/16   | 5/128   | 0.141      | 0.142 | 0.429      | 0.431 | 0.743      | 0.747 |
| 8   | 1/4    | 5/32    | 0.146      | 0.148 | 0.436      | 0.438 | 0.765      | 0.767 |
|     | 1      | 5/8     | 0.143      | 0.147 | 0.425      | 0.433 | 0.739      | 0.746 |
|     | 4      | 20/8    | 0.135      | 0.142 | 0.384      | 0.398 | 0.674      | 0.691 |
|     | 16     | 80/8    | 0.132      | 0.138 | 0.354      | 0.365 | 0.641      | 0.651 |
|     | 64     | 320/8   | 0.128      | 0.131 | 0.344      | 0.350 | 0.625      | 0.629 |
|     | 256    | 1280/8  | 0.126      | 0.127 | 0.338      | 0.339 | 0.619      | 0.621 |
|     | 1/256  | 5/2560  | 0.151      | 0.151 | 0.436      | 0.436 | 0.770      | 0.771 |
|     | 1/64   | 5/640   | 0.148      | 0.147 | 0.438      | 0.439 | 0.763      | 0.764 |
|     | 1/16   | 5/160   | 0.150      | 0.150 | 0.440      | 0.442 | 0.780      | 0.781 |
|     | 1/4    | 5/40    | 0.146      | 0.146 | 0.445      | 0.448 | 0.784      | 0.785 |
|     | 1      | 5/10    | 0.148      | 0.152 | 0.417      | 0.427 | 0.733      | 0.745 |
|     | 4      | 20/10   | 0.135      | 0.142 | 0.380      | 0.394 | 0.680      | 0.695 |
| 10  | 16     | 80/10   | 0.130      | 0.137 | 0.356      | 0.366 | 0.632      | 0.642 |
|     | 64     | 320/10  | 0.126      | 0.129 | 0.339      | 0.343 | 0.632      | 0.634 |
|     | 256    | 1280/10 | 0.126      | 0.127 | 0.328      | 0.328 | 0.626      | 0.627 |
|     | 1/256  | 5/6400  | 0.163      | 0.163 | 0.494      | 0.493 | 0.816      | 0.815 |
|     | 1/64   | 5/1600  | 0.160      | 0.161 | 0.486      | 0.484 | 0.820      | 0.820 |
|     | 1/16   | 5/400   | 0.156      | 0.157 | 0.482      | 0.484 | 0.815      | 0.817 |
|     | 1/4    | 5/100   | 0.157      | 0.162 | 0.444      | 0.456 | 0.770      | 0.781 |
|     | 1      | 5/25    | 0.146      | 0.156 | 0.400      | 0.418 | 0.701      | 0.720 |
|     | 4      | 20/25   | 0.136      | 0.145 | 0.356      | 0.367 | 0.646      | 0.658 |
|     | 16     | 80/25   | 0.130      | 0.134 | 0.347      | 0.355 | 0.624      | 0.629 |
|     | 64     | 320/25  | 0.118      | 0.120 | 0.344      | 0.347 | 0.618      | 0.619 |
|     | 256    | 1280/25 | 0.113      | 0.113 | 0.333      | 0.334 | 0.613      | 0.614 |

TABLE 10

Empirical power of the Welch's  $t$ -test and the MCT at the nominal levels  $\alpha = .05$ . The samples are drawn from normal populations;  $(m, n) = (8, 4), (8, 5), (8, 10), (8, 25)$ ; the variance ratios  $\rho = \sigma_x^2/\sigma_y^2$  varying from  $2^{-8}$  to  $2^8$  and  $\tau = (\sigma_x^2/m)/(\sigma_y^2/n)$ ; the deviation from equality of means is obtained by  $\delta = \eta\sqrt{\sigma_x^2/m + \sigma_y^2/n}$  with  $\eta = 1, 2, 3$ ; results based on 10,000 simulated samples.

| $n$  | $\rho$ | $\tau$  | $\eta = 1$ |       | $\eta = 2$ |       | $\eta = 3$ |       |       |
|------|--------|---------|------------|-------|------------|-------|------------|-------|-------|
|      |        |         | Welch      | MCT   | Welch      | MCT   | Welch      | MCT   |       |
| 4    | 1/256  | 8/1024  | 0.110      | 0.113 | 0.296      | 0.297 | 0.530      | 0.533 |       |
|      | 1/64   | 8/256   | 0.115      | 0.122 | 0.299      | 0.307 | 0.542      | 0.549 |       |
|      | 1/16   | 8/64    | 0.125      | 0.137 | 0.308      | 0.326 | 0.562      | 0.583 |       |
|      | 1/4    | 8/16    | 0.138      | 0.148 | 0.346      | 0.374 | 0.602      | 0.633 |       |
|      | 1      | 8/4     | 0.138      | 0.144 | 0.388      | 0.406 | 0.685      | 0.706 |       |
|      | 4      | 32/4    | 0.141      | 0.143 | 0.417      | 0.423 | 0.757      | 0.760 |       |
|      | 16     | 128/4   | 0.145      | 0.146 | 0.430      | 0.431 | 0.748      | 0.750 |       |
|      | 64     | 512/4   | 0.142      | 0.144 | 0.410      | 0.412 | 0.733      | 0.735 |       |
|      | 256    | 2048/4  | 0.138      | 0.139 | 0.407      | 0.408 | 0.736      | 0.736 |       |
|      | 1/256  | 8/1280  | 0.126      | 0.125 | 0.345      | 0.346 | 0.622      | 0.621 |       |
|      | 1/64   | 8/320   | 0.122      | 0.125 | 0.346      | 0.349 | 0.627      | 0.631 |       |
|      | 1/16   | 8/80    | 0.130      | 0.136 | 0.361      | 0.370 | 0.637      | 0.647 |       |
|      | 1/4    | 8/20    | 0.144      | 0.150 | 0.380      | 0.392 | 0.673      | 0.687 |       |
|      | 1      | 8/5     | 0.134      | 0.138 | 0.404      | 0.413 | 0.746      | 0.754 |       |
|      | 4      | 32/5    | 0.143      | 0.144 | 0.436      | 0.439 | 0.769      | 0.772 |       |
|      | 16     | 128/5   | 0.137      | 0.139 | 0.433      | 0.435 | 0.751      | 0.753 |       |
| 5    | 64     | 512/5   | 0.144      | 0.145 | 0.421      | 0.423 | 0.734      | 0.736 |       |
|      | 256    | 2048/5  | 0.142      | 0.142 | 0.418      | 0.418 | 0.731      | 0.732 |       |
|      | 1/256  | 8/2560  | 0.143      | 0.143 | 0.433      | 0.433 | 0.755      | 0.754 |       |
|      | 1/64   | 8/640   | 0.148      | 0.148 | 0.435      | 0.437 | 0.759      | 0.758 |       |
|      | 1/16   | 8/160   | 0.152      | 0.153 | 0.440      | 0.441 | 0.772      | 0.775 |       |
|      | 1/4    | 8/40    | 0.149      | 0.150 | 0.450      | 0.450 | 0.789      | 0.789 |       |
|      | 1      | 8/10    | 0.148      | 0.149 | 0.454      | 0.457 | 0.796      | 0.797 |       |
|      | 4      | 32/10   | 0.156      | 0.159 | 0.438      | 0.442 | 0.775      | 0.779 |       |
|      | 16     | 128/10  | 0.152      | 0.154 | 0.426      | 0.429 | 0.750      | 0.752 |       |
|      | 64     | 512/10  | 0.146      | 0.145 | 0.412      | 0.412 | 0.734      | 0.735 |       |
|      | 256    | 2048/10 | 0.140      | 0.141 | 0.418      | 0.419 | 0.736      | 0.736 |       |
|      | 1/256  | 8/6400  | 0.161      | 0.161 | 0.487      | 0.488 | 0.824      | 0.824 |       |
|      | 1/64   | 8/1600  | 0.161      | 0.161 | 0.483      | 0.483 | 0.818      | 0.816 |       |
|      | 1/16   | 8/400   | 0.159      | 0.159 | 0.491      | 0.491 | 0.823      | 0.823 |       |
|      | 1/4    | 8/100   | 0.159      | 0.159 | 0.479      | 0.481 | 0.822      | 0.822 |       |
|      | 1      | 8/25    | 0.156      | 0.160 | 0.455      | 0.460 | 0.781      | 0.788 |       |
| 10   | 4      | 32/25   | 0.141      | 0.145 | 0.429      | 0.434 | 0.752      | 0.756 |       |
|      | 16     | 128/25  | 0.136      | 0.137 | 0.403      | 0.405 | 0.732      | 0.733 |       |
|      | 64     | 512/25  | 0.138      | 0.137 | 0.405      | 0.406 | 0.732      | 0.732 |       |
|      | 256    | 2048/25 | 0.138      | 0.138 | 0.409      | 0.408 | 0.734      | 0.734 |       |
|      | 25     | 1/256   | 8/6400     | 0.161 | 0.161      | 0.487 | 0.488      | 0.824 | 0.824 |
|      |        | 1/64    | 8/1600     | 0.161 | 0.161      | 0.483 | 0.483      | 0.818 | 0.816 |
| 1/16 |        | 8/400   | 0.159      | 0.159 | 0.491      | 0.491 | 0.823      | 0.823 |       |
| 1/4  |        | 8/100   | 0.159      | 0.159 | 0.479      | 0.481 | 0.822      | 0.822 |       |
| 1    |        | 8/25    | 0.156      | 0.160 | 0.455      | 0.460 | 0.781      | 0.788 |       |
| 4    |        | 32/25   | 0.141      | 0.145 | 0.429      | 0.434 | 0.752      | 0.756 |       |

TABLE 11

Empirical power of the Welch's  $t$ -test and the MCT at the nominal levels  $\alpha = .05$ . The samples are drawn from normal populations;  $(m, n) = (10, 4), (10, 5), (10, 8), (10, 25)$ ; the variance ratios  $\rho = \sigma_x^2/\sigma_y^2$  varying from  $2^{-8}$  to  $2^8$  and  $\tau = (\sigma_x^2/m)/(\sigma_y^2/n)$ ; the deviation from equality of means is obtained by  $\delta = \eta\sqrt{\sigma_x^2/m + \sigma_y^2/n}$  with  $\eta = 1, 2, 3$ ; results based on 10,000 simulated samples.

| $n$   | $\rho$ | $\tau$  | $\eta = 1$ |       | $\eta = 2$ |       | $\eta = 3$ |       |       |
|-------|--------|---------|------------|-------|------------|-------|------------|-------|-------|
|       |        |         | Welch      | MCT   | Welch      | MCT   | Welch      | MCT   |       |
| 4     | 1/256  | 10/1024 | 0.113      | 0.116 | 0.288      | 0.290 | 0.529      | 0.532 |       |
|       | 1/64   | 10/256  | 0.114      | 0.118 | 0.290      | 0.298 | 0.531      | 0.540 |       |
|       | 1/16   | 10/64   | 0.119      | 0.130 | 0.306      | 0.323 | 0.554      | 0.572 |       |
|       | 1/4    | 10/16   | 0.135      | 0.147 | 0.344      | 0.372 | 0.592      | 0.624 |       |
|       | 1      | 10/4    | 0.142      | 0.150 | 0.395      | 0.416 | 0.685      | 0.711 |       |
|       | 4      | 40/4    | 0.142      | 0.146 | 0.425      | 0.432 | 0.768      | 0.776 |       |
|       | 16     | 160/4   | 0.149      | 0.148 | 0.438      | 0.441 | 0.778      | 0.778 |       |
|       | 64     | 640/4   | 0.146      | 0.146 | 0.432      | 0.433 | 0.771      | 0.770 |       |
|       | 256    | 2560/4  | 0.143      | 0.143 | 0.431      | 0.430 | 0.760      | 0.760 |       |
|       | 1/256  | 10/1280 | 0.124      | 0.125 | 0.334      | 0.332 | 0.618      | 0.619 |       |
|       | 1/64   | 10/320  | 0.124      | 0.127 | 0.336      | 0.341 | 0.624      | 0.628 |       |
|       | 1/16   | 10/80   | 0.132      | 0.138 | 0.347      | 0.358 | 0.641      | 0.648 |       |
|       | 1/4    | 10/20   | 0.141      | 0.148 | 0.390      | 0.406 | 0.678      | 0.695 |       |
|       | 5      | 1       | 10/5       | 0.145 | 0.148      | 0.422 | 0.431      | 0.748 | 0.758 |
| 4     |        | 40/5    | 0.144      | 0.145 | 0.435      | 0.438 | 0.780      | 0.782 |       |
| 16    |        | 160/5   | 0.148      | 0.148 | 0.444      | 0.445 | 0.778      | 0.779 |       |
| 64    |        | 640/5   | 0.149      | 0.150 | 0.437      | 0.439 | 0.766      | 0.767 |       |
| 256   |        | 2560/5  | 0.144      | 0.144 | 0.428      | 0.428 | 0.766      | 0.766 |       |
| 1/256 |        | 10/2048 | 0.141      | 0.141 | 0.397      | 0.398 | 0.737      | 0.735 |       |
| 1/64  |        | 10/512  | 0.145      | 0.146 | 0.413      | 0.415 | 0.736      | 0.737 |       |
| 1/16  |        | 10/128  | 0.144      | 0.146 | 0.432      | 0.436 | 0.745      | 0.746 |       |
| 1/4   |        | 10/32   | 0.146      | 0.149 | 0.442      | 0.446 | 0.767      | 0.771 |       |
| 8     |        | 1       | 10/8       | 0.157 | 0.158      | 0.463 | 0.465      | 0.801 | 0.802 |
|       |        | 4       | 40/10      | 0.156 | 0.157      | 0.459 | 0.461      | 0.790 | 0.792 |
|       |        | 16      | 160/8      | 0.153 | 0.153      | 0.438 | 0.442      | 0.770 | 0.771 |
|       |        | 64      | 640/8      | 0.147 | 0.148      | 0.433 | 0.434      | 0.756 | 0.757 |
|       |        | 256     | 2560/8     | 0.145 | 0.145      | 0.434 | 0.434      | 0.757 | 0.757 |
|       | 1/256  | 10/6400 | 0.160      | 0.159 | 0.482      | 0.483 | 0.823      | 0.821 |       |
|       | 1/64   | 10/1600 | 0.167      | 0.168 | 0.485      | 0.484 | 0.823      | 0.823 |       |
|       | 1/16   | 10/400  | 0.165      | 0.165 | 0.492      | 0.490 | 0.829      | 0.828 |       |
|       | 1/4    | 10/100  | 0.160      | 0.160 | 0.482      | 0.482 | 0.828      | 0.828 |       |
|       | 25     | 1       | 10/25      | 0.159 | 0.161      | 0.473 | 0.473      | 0.802 | 0.805 |
|       |        | 4       | 40/25      | 0.151 | 0.153      | 0.451 | 0.454      | 0.780 | 0.782 |
|       |        | 16      | 160/25     | 0.145 | 0.145      | 0.438 | 0.439      | 0.767 | 0.768 |
|       |        | 64      | 640/25     | 0.148 | 0.148      | 0.423 | 0.423      | 0.757 | 0.757 |
|       |        | 256     | 2560/25    | 0.145 | 0.144      | 0.433 | 0.434      | 0.769 | 0.768 |

TABLE 12

Empirical power of the Welch's  $t$ -test and the MCT at the nominal levels  $\alpha = .05$ . The samples are drawn from normal populations;  $(m, n) = (25, 4), (25, 5), (25, 8), (25, 10)$ ; the variance ratios  $\rho = \sigma_x^2/\sigma_y^2$  varying from  $2^{-8}$  to  $2^8$  and  $\tau = (\sigma_x^2/m)/(\sigma_y^2/n)$ ; the deviation from equality of means is obtained by  $\delta = \eta\sqrt{\sigma_x^2/m + \sigma_y^2/n}$  with  $\eta = 1, 2, 3$ ; results based on 10,000 simulated samples.

| $n$ | $\rho$ | $\tau$  | $\eta = 1$ |       | $\eta = 2$ |       | $\eta = 3$ |       |
|-----|--------|---------|------------|-------|------------|-------|------------|-------|
|     |        |         | Welch      | MCT   | Welch      | MCT   | Welch      | MCT   |
| 4   | 1/256  | 25/1024 | 0.111      | 0.112 | 0.281      | 0.283 | 0.538      | 0.540 |
|     | 1/64   | 25/256  | 0.115      | 0.117 | 0.293      | 0.297 | 0.535      | 0.540 |
|     | 1/16   | 25/64   | 0.117      | 0.125 | 0.299      | 0.311 | 0.536      | 0.548 |
|     | 1/4    | 25/16   | 0.131      | 0.148 | 0.317      | 0.340 | 0.571      | 0.598 |
|     | 1      | 25/4    | 0.144      | 0.159 | 0.367      | 0.397 | 0.630      | 0.665 |
|     | 4      | 100/4   | 0.158      | 0.168 | 0.435      | 0.455 | 0.720      | 0.744 |
|     | 16     | 400/4   | 0.160      | 0.161 | 0.472      | 0.477 | 0.810      | 0.814 |
|     | 64     | 1600/4  | 0.162      | 0.162 | 0.484      | 0.485 | 0.823      | 0.823 |
|     | 256    | 6400/4  | 0.158      | 0.159 | 0.486      | 0.486 | 0.826      | 0.826 |
|     | 1/256  | 25/1280 | 0.121      | 0.121 | 0.338      | 0.338 | 0.615      | 0.614 |
|     | 1/64   | 25/320  | 0.122      | 0.124 | 0.336      | 0.339 | 0.617      | 0.619 |
|     | 1/16   | 25/80   | 0.129      | 0.133 | 0.338      | 0.346 | 0.628      | 0.635 |
|     | 1/4    | 25/20   | 0.134      | 0.142 | 0.348      | 0.360 | 0.643      | 0.658 |
|     | 1      | 25/5    | 0.153      | 0.160 | 0.403      | 0.422 | 0.695      | 0.714 |
| 5   | 4      | 100/5   | 0.151      | 0.156 | 0.447      | 0.456 | 0.783      | 0.794 |
|     | 16     | 400/5   | 0.153      | 0.155 | 0.477      | 0.478 | 0.820      | 0.821 |
|     | 64     | 1600/5  | 0.164      | 0.164 | 0.483      | 0.484 | 0.822      | 0.823 |
|     | 256    | 6400/5  | 0.162      | 0.161 | 0.489      | 0.489 | 0.830      | 0.829 |
|     | 1/256  | 25/2048 | 0.130      | 0.131 | 0.400      | 0.401 | 0.733      | 0.733 |
|     | 1/64   | 25/512  | 0.140      | 0.140 | 0.420      | 0.421 | 0.730      | 0.729 |
|     | 1/16   | 25/128  | 0.142      | 0.143 | 0.409      | 0.412 | 0.733      | 0.734 |
|     | 1/4    | 25/32   | 0.149      | 0.151 | 0.424      | 0.428 | 0.748      | 0.752 |
|     | 1      | 25/8    | 0.154      | 0.155 | 0.459      | 0.467 | 0.782      | 0.786 |
|     | 4      | 100/10  | 0.161      | 0.162 | 0.486      | 0.489 | 0.818      | 0.821 |
|     | 16     | 400/8   | 0.162      | 0.162 | 0.481      | 0.480 | 0.823      | 0.822 |
|     | 64     | 1600/8  | 0.160      | 0.160 | 0.486      | 0.485 | 0.822      | 0.822 |
|     | 256    | 6400/8  | 0.163      | 0.163 | 0.481      | 0.480 | 0.827      | 0.827 |
|     | 1/256  | 25/2560 | 0.145      | 0.147 | 0.429      | 0.428 | 0.768      | 0.769 |
| 10  | 1/64   | 25/640  | 0.147      | 0.147 | 0.441      | 0.442 | 0.761      | 0.762 |
|     | 1/16   | 25/160  | 0.150      | 0.151 | 0.445      | 0.447 | 0.764      | 0.765 |
|     | 1/4    | 25/40   | 0.156      | 0.158 | 0.441      | 0.444 | 0.772      | 0.774 |
|     | 1      | 25/10   | 0.162      | 0.164 | 0.474      | 0.477 | 0.797      | 0.799 |
|     | 4      | 100/10  | 0.156      | 0.156 | 0.495      | 0.495 | 0.832      | 0.832 |
|     | 16     | 400/10  | 0.172      | 0.172 | 0.486      | 0.486 | 0.828      | 0.828 |
|     | 64     | 1600/10 | 0.159      | 0.158 | 0.490      | 0.490 | 0.827      | 0.827 |
|     | 256    | 6400/10 | 0.156      | 0.157 | 0.486      | 0.488 | 0.829      | 0.828 |

### 3. TABLES OF FALSE POSITIVE RATE FOR DATA SIMULATED FROM A $t$ -DISTRIBUTION

TABLE 13

Empirical size of the Welch's  $t$ -test and the MCT at the nominal levels  $\alpha = .01, .05, .10$ . The samples are drawn from a  $t$ -distribution with 5 degrees of freedom;  $m = n = 4, 5, 8, 10, 25$ ; the variance ratios  $\rho = \sigma_x^2/\sigma_y^2$  varying from  $2^{-8}$  to  $2^8$  and  $\tau = (\sigma_x^2/m)/(\sigma_y^2/n)$ ; results based on 10,000 simulated samples.

| $n$ | $\rho$ | $\tau$ | $\alpha = .01$ |       | $\alpha = .05$ |       | $\alpha = .10$ |       |
|-----|--------|--------|----------------|-------|----------------|-------|----------------|-------|
|     |        |        | Welch          | MCT   | Welch          | MCT   | Welch          | MCT   |
| 4   | 1/256  | 1/256  | 0.008          | 0.012 | 0.048          | 0.050 | 0.092          | 0.094 |
|     | 1/64   | 1/64   | 0.010          | 0.013 | 0.044          | 0.048 | 0.092          | 0.096 |
|     | 1/16   | 1/16   | 0.010          | 0.012 | 0.048          | 0.052 | 0.093          | 0.098 |
|     | 1/4    | 1/4    | 0.006          | 0.008 | 0.041          | 0.044 | 0.085          | 0.089 |
|     | 1      | 1      | 0.006          | 0.007 | 0.035          | 0.038 | 0.080          | 0.082 |
|     | 4      | 4      | 0.006          | 0.007 | 0.037          | 0.040 | 0.086          | 0.089 |
|     | 16     | 16     | 0.011          | 0.013 | 0.045          | 0.050 | 0.092          | 0.095 |
|     | 64     | 64     | 0.012          | 0.014 | 0.046          | 0.049 | 0.092          | 0.094 |
|     | 256    | 256    | 0.010          | 0.012 | 0.042          | 0.044 | 0.087          | 0.088 |
|     | 1/256  | 1/256  | 0.008          | 0.010 | 0.041          | 0.043 | 0.092          | 0.094 |
| 5   | 1/64   | 1/64   | 0.010          | 0.011 | 0.046          | 0.047 | 0.093          | 0.095 |
|     | 1/16   | 1/16   | 0.010          | 0.012 | 0.045          | 0.047 | 0.096          | 0.098 |
|     | 1/4    | 1/4    | 0.006          | 0.006 | 0.046          | 0.048 | 0.092          | 0.093 |
|     | 1      | 1      | 0.007          | 0.007 | 0.036          | 0.038 | 0.090          | 0.091 |
|     | 4      | 4      | 0.007          | 0.008 | 0.042          | 0.044 | 0.090          | 0.090 |
|     | 16     | 16     | 0.009          | 0.010 | 0.047          | 0.050 | 0.099          | 0.100 |
|     | 64     | 64     | 0.009          | 0.011 | 0.046          | 0.048 | 0.094          | 0.096 |
|     | 256    | 256    | 0.009          | 0.010 | 0.042          | 0.043 | 0.093          | 0.094 |
|     | 1/256  | 1/256  | 0.007          | 0.008 | 0.044          | 0.044 | 0.096          | 0.097 |
|     | 1/64   | 1/64   | 0.009          | 0.010 | 0.045          | 0.046 | 0.095          | 0.096 |
| 8   | 1/16   | 1/16   | 0.010          | 0.010 | 0.049          | 0.050 | 0.100          | 0.100 |
|     | 1/4    | 1/4    | 0.009          | 0.009 | 0.046          | 0.048 | 0.094          | 0.095 |
|     | 1      | 1      | 0.008          | 0.008 | 0.045          | 0.045 | 0.095          | 0.096 |
|     | 4      | 4      | 0.008          | 0.008 | 0.046          | 0.046 | 0.102          | 0.103 |
|     | 16     | 16     | 0.009          | 0.010 | 0.045          | 0.045 | 0.096          | 0.097 |
|     | 64     | 64     | 0.009          | 0.010 | 0.044          | 0.044 | 0.097          | 0.098 |
|     | 256    | 256    | 0.008          | 0.008 | 0.044          | 0.045 | 0.095          | 0.096 |
|     | 1/256  | 1/256  | 0.008          | 0.008 | 0.048          | 0.047 | 0.097          | 0.097 |
|     | 1/64   | 1/64   | 0.008          | 0.009 | 0.042          | 0.042 | 0.095          | 0.095 |
|     | 1/16   | 1/16   | 0.009          | 0.009 | 0.045          | 0.045 | 0.097          | 0.098 |
| 10  | 1/4    | 1/4    | 0.008          | 0.008 | 0.043          | 0.044 | 0.094          | 0.094 |
|     | 1      | 1      | 0.008          | 0.008 | 0.043          | 0.044 | 0.099          | 0.100 |
|     | 4      | 4      | 0.009          | 0.010 | 0.043          | 0.044 | 0.093          | 0.094 |
|     | 16     | 16     | 0.009          | 0.010 | 0.049          | 0.049 | 0.094          | 0.095 |
|     | 64     | 64     | 0.008          | 0.008 | 0.045          | 0.046 | 0.099          | 0.100 |
|     | 256    | 256    | 0.008          | 0.008 | 0.045          | 0.045 | 0.094          | 0.094 |
|     | 1/256  | 1/256  | 0.011          | 0.010 | 0.046          | 0.048 | 0.095          | 0.095 |
|     | 1/64   | 1/64   | 0.010          | 0.010 | 0.052          | 0.052 | 0.092          | 0.093 |
|     | 1/16   | 1/16   | 0.008          | 0.008 | 0.046          | 0.047 | 0.099          | 0.099 |
|     | 1/4    | 1/4    | 0.008          | 0.008 | 0.047          | 0.048 | 0.099          | 0.099 |
| 25  | 1      | 1      | 0.009          | 0.009 | 0.047          | 0.047 | 0.099          | 0.099 |
|     | 4      | 4      | 0.008          | 0.009 | 0.049          | 0.050 | 0.097          | 0.098 |
|     | 16     | 16     | 0.010          | 0.010 | 0.049          | 0.049 | 0.094          | 0.094 |
|     | 64     | 64     | 0.009          | 0.009 | 0.048          | 0.047 | 0.100          | 0.100 |
|     | 256    | 256    | 0.007          | 0.006 | 0.049          | 0.049 | 0.103          | 0.103 |

TABLE 14

Empirical size of the Welch's  $t$ -test and the MCT at the nominal levels  $\alpha = .01, .05, .10$ . The samples are drawn from a  $t$ -distribution with 5 degrees of freedom;  $(m, n) = (8, 4), (8, 5), (8, 10), (8, 25)$ ; the variance ratios  $\rho = \sigma_x^2/\sigma_y^2$  varying from  $2^{-8}$  to  $2^8$  and  $\tau = (\sigma_x^2/m)/(\sigma_y^2/n)$ ; results based on 10,000 simulated samples.

| $n$   | $\rho$ | $\tau$  | $\alpha = .01$ |       | $\alpha = .05$ |       | $\alpha = .10$ |       |
|-------|--------|---------|----------------|-------|----------------|-------|----------------|-------|
|       |        |         | Welch          | MCT   | Welch          | MCT   | Welch          | MCT   |
| 4     | 1/256  | 8/1024  | 0.000          | 0.000 | 0.002          | 0.003 | 0.009          | 0.009 |
|       | 1/64   | 8/256   | 0.000          | 0.000 | 0.002          | 0.003 | 0.012          | 0.012 |
|       | 1/16   | 8/64    | 0.000          | 0.000 | 0.004          | 0.004 | 0.012          | 0.013 |
|       | 1/4    | 8/16    | 0.001          | 0.001 | 0.005          | 0.006 | 0.019          | 0.022 |
|       | 1      | 8/4     | 0.001          | 0.001 | 0.012          | 0.013 | 0.033          | 0.035 |
|       | 4      | 32/4    | 0.003          | 0.003 | 0.024          | 0.024 | 0.055          | 0.055 |
|       | 16     | 128/4   | 0.004          | 0.004 | 0.038          | 0.038 | 0.088          | 0.088 |
|       | 64     | 512/4   | 0.008          | 0.008 | 0.041          | 0.042 | 0.094          | 0.093 |
|       | 256    | 2048/4  | 0.008          | 0.008 | 0.044          | 0.045 | 0.094          | 0.094 |
|       | 1/256  | 8/1280  | 0.000          | 0.000 | 0.008          | 0.008 | 0.025          | 0.025 |
|       | 1/64   | 8/320   | 0.001          | 0.001 | 0.007          | 0.008 | 0.024          | 0.025 |
|       | 1/16   | 8/80    | 0.002          | 0.002 | 0.009          | 0.010 | 0.034          | 0.035 |
|       | 1/4    | 8/20    | 0.001          | 0.002 | 0.012          | 0.014 | 0.037          | 0.039 |
|       | 5      | 1       | 8/5            | 0.002 | 0.002          | 0.019 | 0.020          | 0.048 |
| 4     |        | 32/5    | 0.004          | 0.004 | 0.031          | 0.032 | 0.073          | 0.073 |
| 16    |        | 128/5   | 0.006          | 0.006 | 0.038          | 0.039 | 0.086          | 0.086 |
| 64    |        | 512/5   | 0.008          | 0.008 | 0.046          | 0.046 | 0.095          | 0.096 |
| 256   |        | 2048/5  | 0.008          | 0.008 | 0.046          | 0.045 | 0.093          | 0.093 |
| 1/256 |        | 8/2560  | 0.019          | 0.018 | 0.075          | 0.075 | 0.143          | 0.143 |
| 1/64  |        | 8/640   | 0.019          | 0.020 | 0.075          | 0.075 | 0.134          | 0.134 |
| 1/16  |        | 8/160   | 0.017          | 0.018 | 0.077          | 0.078 | 0.141          | 0.143 |
| 1/4   |        | 8/40    | 0.017          | 0.018 | 0.070          | 0.070 | 0.134          | 0.133 |
| 1     |        | 8/10    | 0.009          | 0.010 | 0.056          | 0.057 | 0.117          | 0.118 |
| 4     |        | 32/10   | 0.010          | 0.010 | 0.048          | 0.049 | 0.105          | 0.106 |
| 16    |        | 128/10  | 0.009          | 0.010 | 0.047          | 0.048 | 0.095          | 0.096 |
| 64    |        | 512/10  | 0.007          | 0.007 | 0.046          | 0.046 | 0.096          | 0.096 |
| 256   |        | 2048/10 | 0.007          | 0.007 | 0.047          | 0.046 | 0.090          | 0.091 |
| 10    | 1/256  | 8/6400  | 0.151          | 0.150 | 0.289          | 0.288 | 0.367          | 0.366 |
|       | 1/64   | 8/1600  | 0.145          | 0.145 | 0.281          | 0.281 | 0.355          | 0.355 |
|       | 1/16   | 8/400   | 0.116          | 0.115 | 0.245          | 0.246 | 0.337          | 0.337 |
|       | 1/4    | 8/100   | 0.076          | 0.077 | 0.177          | 0.178 | 0.273          | 0.273 |
|       | 1      | 8/25    | 0.034          | 0.036 | 0.105          | 0.107 | 0.181          | 0.182 |
|       | 4      | 32/25   | 0.018          | 0.019 | 0.065          | 0.065 | 0.125          | 0.126 |
|       | 16     | 128/25  | 0.010          | 0.010 | 0.051          | 0.051 | 0.104          | 0.104 |
|       | 64     | 512/25  | 0.008          | 0.008 | 0.045          | 0.045 | 0.099          | 0.099 |
|       | 256    | 2048/25 | 0.009          | 0.009 | 0.045          | 0.045 | 0.094          | 0.094 |

#### 4. POWER TABLES FOR THE DATA SIMULATED FROM *t*-DISTRIBUTION

TABLE 15

*Empirical power of the Welch's t-test and the MCT at the nominal levels  $\alpha = .05$ . The samples are drawn from a t-distribution with 5 degrees of freedom;  $m = n = 4, 5, 8, 10, 25$ ; the variance ratios  $\rho = \sigma_x^2/\sigma_y^2$  varying from  $2^{-8}$  to  $2^8$  and  $\tau = (\sigma_x^2/m)/(\sigma_y^2/n)$ ; the deviation from equality of means is obtained by  $\delta = \eta\sqrt{\sigma_x^2/m + \sigma_y^2/n}$  with  $\eta = 1, 2, 3$ ; results based on 10,000 simulated samples.*

| <i>n</i> | $\rho$ | $\tau$ | $\eta = 1$ |       | $\eta = 2$ |       | $\eta = 3$ |       |
|----------|--------|--------|------------|-------|------------|-------|------------|-------|
|          |        |        | Welch      | MCT   | Welch      | MCT   | Welch      | MCT   |
| 4        | 1/256  | 1/256  | 0.094      | 0.097 | 0.245      | 0.250 | 0.452      | 0.456 |
|          | 1/64   | 1/64   | 0.096      | 0.101 | 0.246      | 0.258 | 0.459      | 0.470 |
|          | 1/16   | 1/16   | 0.105      | 0.112 | 0.268      | 0.285 | 0.477      | 0.495 |
|          | 1/4    | 1/4    | 0.095      | 0.102 | 0.273      | 0.287 | 0.501      | 0.519 |
|          | 1      | 1      | 0.088      | 0.093 | 0.265      | 0.277 | 0.505      | 0.520 |
|          | 4      | 4      | 0.096      | 0.100 | 0.279      | 0.291 | 0.505      | 0.522 |
|          | 16     | 16     | 0.106      | 0.114 | 0.268      | 0.281 | 0.467      | 0.487 |
|          | 64     | 64     | 0.103      | 0.108 | 0.261      | 0.271 | 0.453      | 0.466 |
|          | 256    | 256    | 0.096      | 0.100 | 0.242      | 0.246 | 0.440      | 0.446 |
|          | 1/256  | 1/256  | 0.106      | 0.106 | 0.275      | 0.277 | 0.506      | 0.507 |
| 5        | 1/64   | 1/64   | 0.104      | 0.107 | 0.277      | 0.284 | 0.508      | 0.513 |
|          | 1/16   | 1/16   | 0.111      | 0.116 | 0.290      | 0.298 | 0.532      | 0.542 |
|          | 1/4    | 1/4    | 0.112      | 0.115 | 0.296      | 0.304 | 0.552      | 0.561 |
|          | 1      | 1      | 0.097      | 0.101 | 0.298      | 0.304 | 0.564      | 0.572 |
|          | 4      | 4      | 0.106      | 0.110 | 0.290      | 0.296 | 0.547      | 0.557 |
|          | 16     | 16     | 0.103      | 0.108 | 0.292      | 0.300 | 0.525      | 0.535 |
|          | 64     | 64     | 0.104      | 0.108 | 0.277      | 0.282 | 0.509      | 0.516 |
|          | 256    | 256    | 0.099      | 0.100 | 0.269      | 0.273 | 0.504      | 0.506 |
|          | 1/256  | 1/256  | 0.116      | 0.116 | 0.314      | 0.314 | 0.593      | 0.592 |
|          | 1/64   | 1/64   | 0.117      | 0.118 | 0.318      | 0.319 | 0.583      | 0.585 |
| 8        | 1/16   | 1/16   | 0.116      | 0.118 | 0.332      | 0.336 | 0.593      | 0.595 |
|          | 1/4    | 1/4    | 0.114      | 0.116 | 0.328      | 0.330 | 0.610      | 0.614 |
|          | 1      | 1      | 0.114      | 0.115 | 0.328      | 0.329 | 0.609      | 0.610 |
|          | 4      | 4      | 0.106      | 0.108 | 0.320      | 0.323 | 0.601      | 0.602 |
|          | 16     | 16     | 0.119      | 0.120 | 0.329      | 0.331 | 0.590      | 0.593 |
|          | 64     | 64     | 0.112      | 0.114 | 0.316      | 0.317 | 0.584      | 0.586 |
|          | 256    | 256    | 0.113      | 0.114 | 0.323      | 0.323 | 0.578      | 0.577 |
|          | 1/256  | 1/256  | 0.116      | 0.118 | 0.333      | 0.334 | 0.602      | 0.601 |
|          | 1/64   | 1/64   | 0.115      | 0.116 | 0.326      | 0.326 | 0.595      | 0.595 |
|          | 1/16   | 1/16   | 0.122      | 0.122 | 0.324      | 0.324 | 0.607      | 0.608 |
| 10       | 1/4    | 1/4    | 0.122      | 0.123 | 0.334      | 0.336 | 0.615      | 0.618 |
|          | 1      | 1      | 0.120      | 0.121 | 0.338      | 0.339 | 0.616      | 0.618 |
|          | 4      | 4      | 0.112      | 0.113 | 0.332      | 0.333 | 0.621      | 0.622 |
|          | 16     | 16     | 0.127      | 0.128 | 0.328      | 0.329 | 0.609      | 0.609 |
|          | 64     | 64     | 0.119      | 0.118 | 0.330      | 0.330 | 0.608      | 0.608 |
|          | 256    | 256    | 0.122      | 0.122 | 0.329      | 0.330 | 0.606      | 0.603 |
|          | 1/256  | 1/256  | 0.118      | 0.118 | 0.347      | 0.347 | 0.633      | 0.633 |
|          | 1/64   | 1/64   | 0.121      | 0.120 | 0.348      | 0.348 | 0.620      | 0.620 |
|          | 1/16   | 1/16   | 0.120      | 0.121 | 0.348      | 0.348 | 0.637      | 0.638 |
|          | 1/4    | 1/4    | 0.130      | 0.130 | 0.345      | 0.346 | 0.639      | 0.638 |
| 25       | 1      | 1      | 0.127      | 0.127 | 0.348      | 0.348 | 0.643      | 0.644 |
|          | 4      | 4      | 0.123      | 0.123 | 0.359      | 0.360 | 0.637      | 0.637 |
|          | 16     | 16     | 0.123      | 0.124 | 0.352      | 0.352 | 0.631      | 0.631 |
|          | 64     | 64     | 0.126      | 0.126 | 0.350      | 0.351 | 0.638      | 0.638 |
|          | 256    | 256    | 0.122      | 0.122 | 0.346      | 0.346 | 0.637      | 0.638 |



TABLE 16

Empirical power of the Welch's  $t$ -test and the MCT at the nominal levels  $\alpha = .05$ . The samples are drawn from a  $t$ -distribution with 5 degrees of freedom;  $(m, n) = (8, 4), (8, 5), (8, 10), (8, 25)$ ; the variance ratios  $\rho = \sigma_x^2/\sigma_y^2$  varying from  $2^{-8}$  to  $2^8$  and  $\tau = (\sigma_x^2/m)/(\sigma_y^2/n)$ ; the deviation from equality of means is obtained by  $\delta = \eta\sqrt{\sigma_x^2/m + \sigma_y^2/n}$  with  $\eta = 1, 2, 3$ ; results based on 10,000 simulated samples.

| $n$   | $\rho$  | $\tau$ | $\eta = 1$ |       | $\eta = 2$ |       | $\eta = 3$ |       |
|-------|---------|--------|------------|-------|------------|-------|------------|-------|
|       |         |        | Welch      | MCT   | Welch      | MCT   | Welch      | MCT   |
| 4     | 1/256   | 8/1024 | 0.018      | 0.020 | 0.114      | 0.117 | 0.343      | 0.345 |
|       | 1/64    | 8/256  | 0.018      | 0.020 | 0.119      | 0.128 | 0.343      | 0.353 |
|       | 1/16    | 8/64   | 0.024      | 0.029 | 0.136      | 0.154 | 0.368      | 0.397 |
|       | 1/4     | 8/16   | 0.035      | 0.041 | 0.167      | 0.190 | 0.429      | 0.463 |
|       | 1       | 8/4    | 0.054      | 0.059 | 0.223      | 0.240 | 0.510      | 0.536 |
|       | 4       | 32/4   | 0.081      | 0.083 | 0.286      | 0.292 | 0.576      | 0.584 |
|       | 16      | 128/4  | 0.111      | 0.113 | 0.323      | 0.326 | 0.589      | 0.589 |
|       | 64      | 512/4  | 0.114      | 0.115 | 0.314      | 0.315 | 0.588      | 0.590 |
|       | 256     | 2048/4 | 0.115      | 0.117 | 0.309      | 0.310 | 0.586      | 0.586 |
|       | 1/256   | 8/1280 | 0.043      | 0.044 | 0.187      | 0.188 | 0.455      | 0.457 |
|       | 1/64    | 8/320  | 0.045      | 0.047 | 0.195      | 0.200 | 0.453      | 0.460 |
|       | 1/16    | 8/80   | 0.051      | 0.055 | 0.211      | 0.224 | 0.473      | 0.486 |
|       | 1/4     | 8/20   | 0.056      | 0.061 | 0.237      | 0.249 | 0.517      | 0.536 |
|       | 1       | 8/5    | 0.078      | 0.080 | 0.269      | 0.278 | 0.563      | 0.573 |
|       | 4       | 32/5   | 0.094      | 0.097 | 0.304      | 0.304 | 0.589      | 0.591 |
|       | 16      | 128/5  | 0.104      | 0.106 | 0.331      | 0.332 | 0.593      | 0.597 |
| 64    | 512/5   | 0.110  | 0.111      | 0.310 | 0.311      | 0.592 | 0.591      |       |
| 256   | 2048/5  | 0.114  | 0.113      | 0.319 | 0.319      | 0.575 | 0.576      |       |
| 1/256 | 8/2560  | 0.157  | 0.156      | 0.366 | 0.365      | 0.601 | 0.600      |       |
| 1/64  | 8/640   | 0.155  | 0.157      | 0.357 | 0.358      | 0.610 | 0.611      |       |
| 1/16  | 8/160   | 0.154  | 0.155      | 0.368 | 0.368      | 0.608 | 0.610      |       |
| 1/4   | 8/40    | 0.145  | 0.146      | 0.354 | 0.355      | 0.615 | 0.617      |       |
| 1     | 8/10    | 0.126  | 0.127      | 0.340 | 0.340      | 0.609 | 0.610      |       |
| 4     | 32/10   | 0.123  | 0.124      | 0.333 | 0.336      | 0.614 | 0.617      |       |
| 16    | 128/10  | 0.121  | 0.122      | 0.329 | 0.332      | 0.582 | 0.584      |       |
| 64    | 512/10  | 0.119  | 0.120      | 0.322 | 0.324      | 0.582 | 0.583      |       |
| 256   | 2048/10 | 0.116  | 0.115      | 0.324 | 0.325      | 0.587 | 0.588      |       |
| 1/256 | 8/6400  | 0.338  | 0.336      | 0.454 | 0.453      | 0.612 | 0.613      |       |
| 1/64  | 8/1600  | 0.328  | 0.328      | 0.466 | 0.466      | 0.629 | 0.629      |       |
| 1/16  | 8/400   | 0.306  | 0.308      | 0.444 | 0.444      | 0.619 | 0.619      |       |
| 1/4   | 8/100   | 0.242  | 0.242      | 0.404 | 0.405      | 0.606 | 0.608      |       |
| 1     | 8/25    | 0.176  | 0.178      | 0.360 | 0.364      | 0.593 | 0.597      |       |
| 4     | 32/25   | 0.136  | 0.137      | 0.333 | 0.338      | 0.591 | 0.594      |       |
| 16    | 128/25  | 0.124  | 0.125      | 0.312 | 0.315      | 0.581 | 0.584      |       |
| 64    | 512/25  | 0.112  | 0.113      | 0.325 | 0.326      | 0.588 | 0.588      |       |
| 256   | 2048/25 | 0.116  | 0.117      | 0.314 | 0.314      | 0.580 | 0.578      |       |

## 5. SUPPLEMENTARY MATERIALS FOR REAL CHILDHOOD ACUTE LYMPHOBLASTIC LEUKEMIA GENE EXPRESSION STUDY

Sparse principal component analysis (sPCA) was recently introduced as a powerful tool that, together with dimension reduction, also helps in the selection of important variables (Shen & Huang, 2008). The sPCA allows for the number of non-zero loadings that one wishes to keep in each principal component (PC) to be controlled. In this case, the second PC reflects the within-group variation (see Figure 1). Therefore, we let the loadings of all 6,307 genes as non-zero in the second PC (since this PC is not of our interest). The first component reflects the between-group variation and we forced the loadings of all the genes to be equal to zero except 500, 300, 200 and 100 (see corresponding PCA plots in Figure 1).

Interestingly, most of the 72 additional genes were selected among top 500, 300, 200 and 100 identified as important by the sPCA (to differentiate between the two groups) and are ranked, respectively, from one to four stars in Table 17.

We also used sparse PLS Discriminant Analysis (sPLS-DA) (Boitard et al., 2011) to identify differentially expressed genes. Similar to the sPCA, sPLS-DA also allowed us to specify the number of non-zero loadings for a particular component. The component-1 of sPLS-DA represent the between-group variation (see Figure 1) and we specified 500, 300, 200 and 100 of the loadings of component-1 to be non-zero. Since component-2 represents a within-group variation, we allowed all 6,307 genes to have non-zero loadings. Many of the 72 additional genes were selected as important by sPLS-DA to differentiate the two ALL types. We ranked these important genes in Table 18 from one to four stars depending on whether they were included in top 500, 300, 200 and 100, respectively.

Note that we performed sPCA and sPLS-DA using `spca()` and `splsda()` functions implemented in R package `mixOmics` (Rohart et al., 2017).

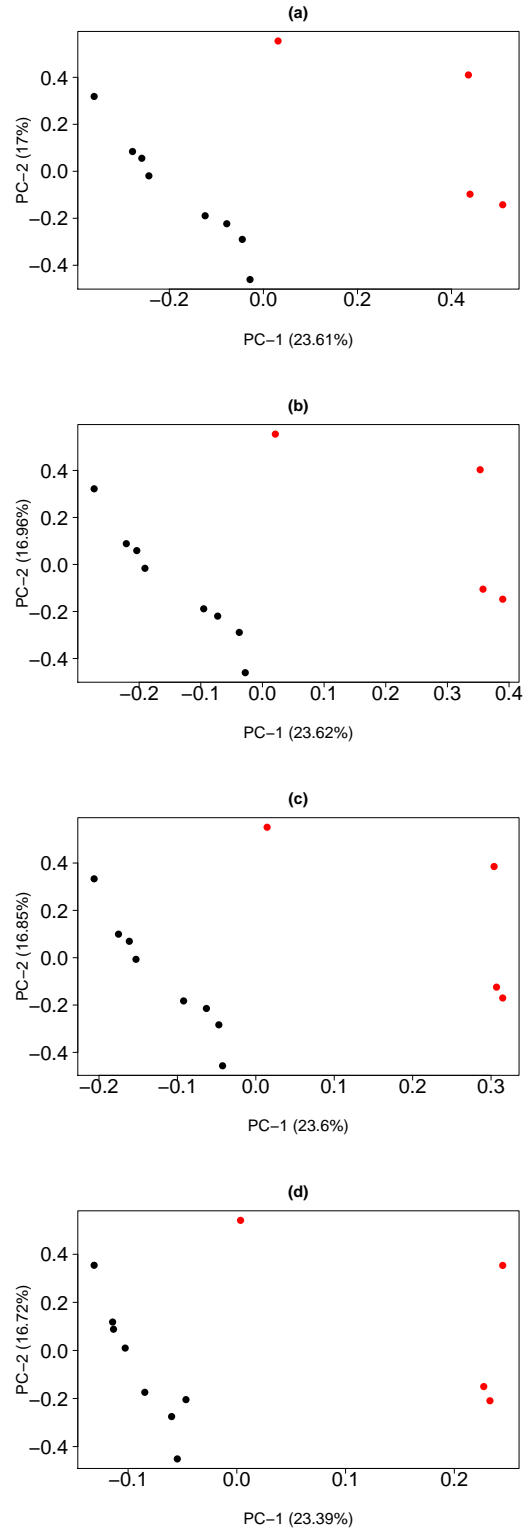

FIG 1. *Sparse PCA plot. The Sparse PCA algorithm is forced to select top; (a) 500, (b) 300, (c) 200, and (d) 100 differentially expressed genes for the second component that represents variation between the two groups and all 6307 genes for first component that represent with-in group variation. The red dots represent subtype BCR-ABL and the black dots represent subtype E2A-rearranged (EP).*

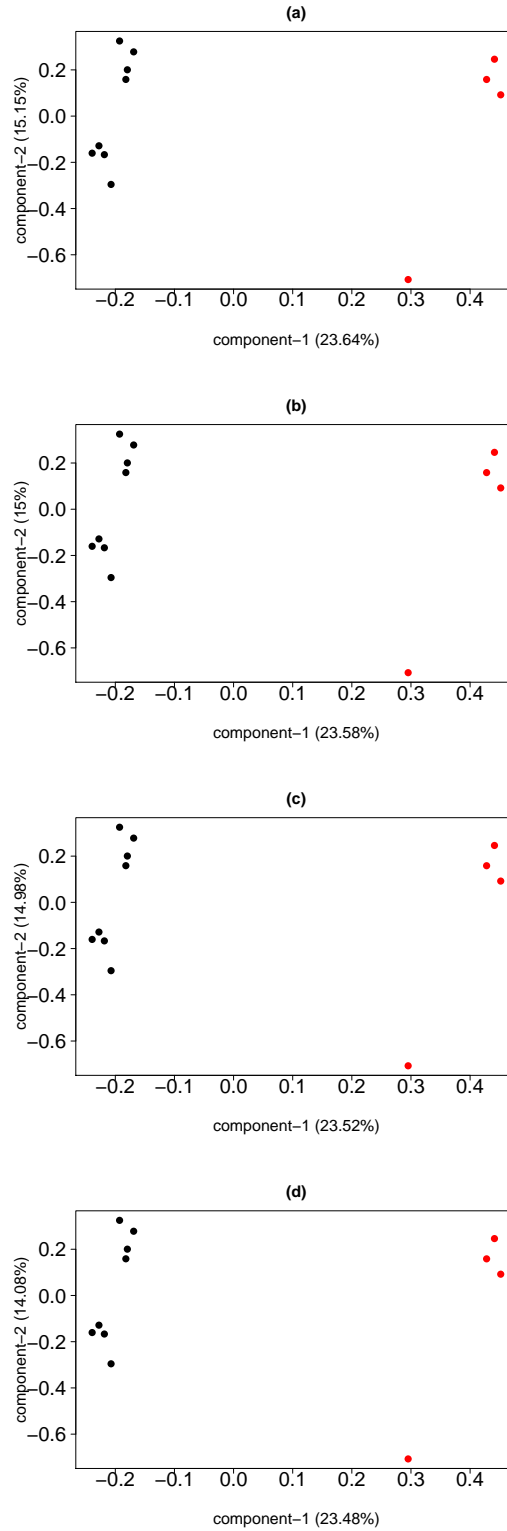

FIG 2. Sparse PLS-DA scores plot. The sparse PLS-DA algorithm is forced to select top; (a) 500, (b) 300, (c) 200, and (d) 100 differentially expressed genes for the first component that represents variation between the two groups and all 6307 genes for second component that represent with-in group variation. The red dots represent subtype BCR-ABL and the black dots represent subtype E2A-rearranged (EP).

## REFERENCES

- Boitard, S., Besse, P., et al. (2011). Sparse pls discriminant analysis: biologically relevant feature selection and graphical displays for multiclass problems. <http://www.biomedcentral.com/bmcbioinformatics/>.
- Rohart, F., Gautier, B., Singh, A., & Le Cao, K.-A. (2017). mixomics: An r package for ‘omics feature selection and multiple data integration. *PLoS computational biology*, *13*(11), e1005752.
- Shen, H., & Huang, J. Z. (2008). Sparse principal component analysis via regularized low rank matrix approximation. *Journal of multivariate analysis*, *99*(6), 1015–1034.

TABLE 17

The list of 72 additional genes identified by the MCT at 0.01 level of significance. The genes selected by sparse PCA among top 500, 300, 200 and 100 are ranked, respectively, from one to four stars.

| Probe Set ID | BCR-ABL         |             | E2A-rearranged (EP) |           | p-values |       |
|--------------|-----------------|-------------|---------------------|-----------|----------|-------|
|              | mean (sd)       | mean (sd)   | mean (sd)           | mean (sd) | MCT      | Welch |
| NONO         | 200057.s.at     | 8.58 (0.21) | 8.12 (0.2)          | 0.0085    | 0.0118   |       |
| TMED2        | 200087.s.at     | 7.18 (0.24) | 6.64 (0.29)         | 0.0083    | 0.0102   |       |
| CALM         | 200655.s.at     | 7.83 (0.38) | 6.95 (0.17)         | 0.0089    | 0.014    |       |
| LAPTM4A      | 200673.at       | 7.7 (0.41)  | 6.83 (0.39)         | 0.0086    | 0.0123   |       |
| PGK1         | 200737.at       | 5.76 (0.34) | 5.01 (0.31)         | 0.008     | 0.0116   |       |
| ARL6IP5      | 200761.s.at**** | 5.67 (0.63) | 4.36 (0.6)          | 0.0098    | 0.0142   |       |
| ZNF207       | 200828.s.at     | 7.93 (0.44) | 7 (0.34)            | 0.0093    | 0.0141   |       |
| IST1         | 200851.s.at***  | 7.17 (0.41) | 6.28 (0.46)         | 0.0092    | 0.012    |       |
| PSAP         | 200866.s.at***  | 6.58 (0.74) | 4.82 (0.42)         | 0.0064    | 0.0114   |       |
| ACTR3        | 200996.at*      | 6.34 (0.42) | 5.36 (0.3)          | 0.0063    | 0.011    |       |
| PSMF1        | 201052.s.at     | 4.78 (0.42) | 3.89 (0.47)         | 0.0096    | 0.0128   |       |
| ATP6V1B2     | 201089.at****   | 5.5 (0.59)  | 4.15 (0.29)         | 0.009     | 0.0142   |       |
| HNRNPH2      | 201132.at       | 3.8 (0.44)  | 2.83 (0.51)         | 0.0095    | 0.0111   |       |
| BHLHE40      | 201170.s.at**** | 7.25 (0.99) | 4.97 (0.57)         | 0.0072    | 0.0129   |       |
| SEC11A       | 201290.at****   | 6.04 (0.37) | 5.18 (0.27)         | 0.0061    | 0.0103   |       |
| SLC9A3R1     | 201349.at****   | 5.33 (0.72) | 3.75 (0.55)         | 0.0084    | 0.0125   |       |
| CUL3         | 201371.s.at**   | 7.3 (0.43)  | 6.32 (0.57)         | 0.0087    | 0.0101   |       |
| ITGA5        | 201389.at****   | 6.04 (0.77) | 4.28 (0.58)         | 0.0062    | 0.0107   |       |
| TRAM1        | 201398.s.at*    | 6.59 (0.32) | 5.9 (0.36)          | 0.0096    | 0.0123   |       |
| PLEKHB2      | 201411.s.at     | 5.02 (0.68) | 3.18 (1.33)         | 0.01      | 0.0101   |       |
| ETF1         | 201573.s.at     | 5.92 (0.44) | 4.89 (0.22)         | 0.007     | 0.0127   |       |
| IRAK1        | 201587.s.at     | 6.84 (0.59) | 5.58 (0.49)         | 0.0084    | 0.013    |       |
| USP14        | 201672.s.at**** | 6.14 (0.41) | 5.2 (0.21)          | 0.0082    | 0.0141   |       |
| EFCAB14      | 201778.s.at     | 4.68 (0.33) | 3.93 (0.44)         | 0.0097    | 0.0109   |       |
| SEC63        | 201914.s.at     | 4.8 (0.42)  | 3.86 (0.4)          | 0.0076    | 0.0109   |       |
| SLC25A36     | 201917.s.at**** | 5.72 (0.51) | 4.56 (0.26)         | 0.0078    | 0.0139   |       |
| KIF5B        | 201991.s.at     | 6.23 (0.26) | 5.65 (0.22)         | 0.0068    | 0.0105   |       |
| SPG7         | 202104.s.at     | 3.81 (0.37) | 3 (0.41)            | 0.0089    | 0.0114   |       |
| RAP1A        | 202362.at****   | 5.24 (0.63) | 3.71 (0.39)         | 0.005     | 0.0101   |       |
| BASP1        | 202391.at       | 4.45 (0.64) | 5.86 (0.78)         | 0.0094    | 0.0114   |       |
| SEC24B       | 202798.at***    | 5.4 (0.59)  | 4.15 (0.49)         | 0.0096    | 0.014    |       |
| CYTH1        | 202879.s.at**** | 4.86 (0.6)  | 3.57 (0.52)         | 0.0094    | 0.0133   |       |
| RHOBTB3      | 202975.s.at*    | 3.51 (0.39) | 2.66 (0.32)         | 0.008     | 0.0125   |       |
| RREB1        | 203704.s.at***  | 5.44 (0.26) | 4.88 (0.27)         | 0.0093    | 0.0119   |       |
| PDE4B        | 203708.at****   | 6.49 (1.3)  | 3.7 (0.88)          | 0.0088    | 0.0145   |       |
| CSF2RB       | 205159.at       | 3.71 (1.2)  | 6.43 (0.6)          | 0.0086    | 0.0145   |       |
| AAK1         | 205434.s.at     | 5.27 (0.23) | 4.78 (0.26)         | 0.0094    | 0.0116   |       |
| CTDSP2       | 208735.s.at     | 5.36 (0.57) | 4.1 (0.59)          | 0.0081    | 0.011    |       |
| SAP18        | 208742.s.at     | 8.38 (0.3)  | 7.73 (0.25)         | 0.008     | 0.0122   |       |
| REEP5        | 208872.s.at     | 5.51 (0.43) | 4.56 (0.31)         | 0.0087    | 0.0136   |       |
| KPNB1        | 208974.x.at     | 6 (0.32)    | 5.3 (0.29)          | 0.0084    | 0.0124   |       |
| STX3         | 209238.at****   | 4.99 (0.79) | 3.21 (0.74)         | 0.0065    | 0.0104   |       |
| SAT1         | 210592.s.at***  | 8.45 (0.81) | 6.73 (0.87)         | 0.0099    | 0.0128   |       |
| UBR4         | 211950.at**     | 5.79 (0.47) | 4.79 (0.49)         | 0.01      | 0.013    |       |
| KBTD2        | 212447.at       | 5.58 (0.48) | 4.52 (0.24)         | 0.0096    | 0.0158   |       |
| RMND5A       | 212482.at       | 5.41 (0.35) | 4.68 (0.24)         | 0.0099    | 0.0153   |       |
| DENND5A      | 212561.at****   | 6.54 (0.47) | 5.47 (0.26)         | 0.0086    | 0.014    |       |
| AUTS2        | 212599.at       | 5.18 (0.49) | 6.25 (0.36)         | 0.0082    | 0.0128   |       |
| DNMBP        | 212838.at****   | 4.88 (0.6)  | 3.54 (0.38)         | 0.0081    | 0.0137   |       |
| GNPTAB       | 212959.s.at**** | 5.11 (0.64) | 3.71 (0.48)         | 0.0083    | 0.0132   |       |
| CASP8        | 213373.s.at*    | 5.4 (0.92)  | 3.44 (0.61)         | 0.0096    | 0.0149   |       |
| POLR2E       | 213887.s.at     | 5.22 (0.59) | 3.91 (0.49)         | 0.0073    | 0.0116   |       |
| LST1         | 214181.x.at     | 5.4 (1.55)  | 2.12 (1.18)         | 0.0095    | 0.0143   |       |
| SUB1         | 214512.s.at***  | 7.6 (0.45)  | 6.49 (0.27)         | 0.0058    | 0.0105   |       |
| TBC1D9B      | 215994.x.at*    | 4.99 (0.18) | 4.6 (0.18)          | 0.0086    | 0.0114   |       |
| WDR83OS      | 217780.at       | 6.35 (0.26) | 5.75 (0.33)         | 0.0085    | 0.0101   |       |
| KCMF1        | 217938.s.at***  | 7.17 (0.36) | 6.4 (0.28)          | 0.0084    | 0.0133   |       |
| NOSIP        | 217950.at       | 4.71 (0.23) | 4.19 (0.2)          | 0.0069    | 0.0108   |       |
| BCL2L13      | 217955.at       | 3.63 (0.57) | 2.36 (0.59)         | 0.0074    | 0.0104   |       |
| TSPAN13      | 217979.at       | 6.44 (0.67) | 5.02 (0.45)         | 0.0097    | 0.0158   |       |
| ZFAND3       | 218020.s.at***  | 5.17 (0.32) | 4.45 (0.3)          | 0.0067    | 0.01     |       |
| ZDHHC6       | 218249.at       | 3.81 (0.07) | 3.22 (0.48)         | 0.0096    | 0.01     |       |
| NDE1         | 218414.s.at     | 5.26 (0.38) | 4.38 (0.33)         | 0.0064    | 0.0102   |       |
| PSMG2        | 218467.at       | 7.49 (0.27) | 6.89 (0.31)         | 0.0087    | 0.0106   |       |
| COQ10B       | 219397.at       | 5.59 (0.39) | 4.74 (0.44)         | 0.0089    | 0.0114   |       |
| BNIP3L       | 221478.at       | 5.37 (0.45) | 4.38 (0.49)         | 0.0084    | 0.0109   |       |
| YTHDF3       | 221749.at       | 4.97 (0.41) | 4.08 (0.38)         | 0.008     | 0.0116   |       |
| FGFR1        | 222164.at**     | 4.7 (0.28)  | 4.1 (0.26)          | 0.0094    | 0.0135   |       |
| ACTR10       | 222230.s.at*    | 4.64 (0.5)  | 3.54 (0.4)          | 0.008     | 0.0123   |       |
| PDCD6        | 222380.s.at     | 3.35 (0.6)  | 4.66 (0.51)         | 0.0089    | 0.0127   |       |
| SAFB2        | 320999.at***    | 5.42 (0.35) | 4.65 (0.31)         | 0.007     | 0.011    |       |
| KDM6B        | 41387.r.at*     | 5.42 (0.33) | 4.69 (0.39)         | 0.0093    | 0.0113   |       |

\*among top 500 \*\*among top 300 \*\*\*among top 200 \*\*\*\*among top 100

TABLE 18

The list of 72 additional genes identified by MCT at 0.01 level of significance. The genes selected by sparse PLS-DA among top 500, 300, 200 and 100 are ranked, respectively, from one to four stars.

| Probe Set ID             | BCR-ABL     |             | E2A-rearranged (EP) |           | p-value |        |
|--------------------------|-------------|-------------|---------------------|-----------|---------|--------|
|                          | mean (sd)   | mean (sd)   | mean (sd)           | mean (sd) | MCT     | Welch  |
| NONO 200057.s.at*        | 8.58 (0.21) | 8.12 (0.2)  |                     |           | 0.0085  | 0.0118 |
| TMED2 200087.s.at        | 7.18 (0.24) | 6.64 (0.29) |                     |           | 0.0083  | 0.0102 |
| CALM 200655.s.at****     | 7.83 (0.38) | 6.95 (0.17) |                     |           | 0.0089  | 0.014  |
| LAPTM4A 200673.at        | 7.7 (0.41)  | 6.83 (0.39) |                     |           | 0.0086  | 0.0123 |
| PGK1 200737.at*          | 5.76 (0.34) | 5.01 (0.31) |                     |           | 0.008   | 0.0116 |
| ARL6IP5 200761.s.at      | 5.67 (0.63) | 4.36 (0.6)  |                     |           | 0.0098  | 0.0142 |
| ZNF207 200828.s.at*      | 7.93 (0.44) | 7 (0.34)    |                     |           | 0.0093  | 0.0141 |
| IST1 200851.s.at         | 7.17 (0.41) | 6.28 (0.46) |                     |           | 0.0092  | 0.012  |
| PSAP 200866.s.at****     | 6.58 (0.74) | 4.82 (0.42) |                     |           | 0.0064  | 0.0114 |
| ACTR3 200996.at***       | 6.34 (0.42) | 5.36 (0.3)  |                     |           | 0.0063  | 0.011  |
| PSMF1 201052.s.at        | 4.78 (0.42) | 3.89 (0.47) |                     |           | 0.0096  | 0.0128 |
| ATP6V1B2 201089.at****   | 5.5 (0.59)  | 4.15 (0.29) |                     |           | 0.009   | 0.0142 |
| HNRNP2 201132.at         | 3.8 (0.44)  | 2.83 (0.51) |                     |           | 0.0095  | 0.0111 |
| BHLHE40 201170.s.at***   | 7.25 (0.99) | 4.97 (0.57) |                     |           | 0.0072  | 0.0129 |
| SEC11A 201290.at***      | 6.04 (0.37) | 5.18 (0.27) |                     |           | 0.0061  | 0.0103 |
| SLC9A3R1 201349.at**     | 5.33 (0.72) | 3.75 (0.55) |                     |           | 0.0084  | 0.0125 |
| CUL3 201371.s.at         | 7.3 (0.43)  | 6.32 (0.57) |                     |           | 0.0087  | 0.0101 |
| ITGA5 201389.at**        | 6.04 (0.77) | 4.28 (0.58) |                     |           | 0.0062  | 0.0107 |
| TRAM1 201398.s.at        | 6.59 (0.32) | 5.9 (0.36)  |                     |           | 0.0096  | 0.0123 |
| PLEKHB2 201411.s.at      | 5.02 (0.68) | 3.18 (1.33) |                     |           | 0.01    | 0.0101 |
| ETF1 201573.s.at****     | 5.92 (0.44) | 4.89 (0.22) |                     |           | 0.007   | 0.0127 |
| IRAK1 201587.s.at*       | 6.84 (0.59) | 5.58 (0.49) |                     |           | 0.0084  | 0.013  |
| USP14 201672.s.at****    | 6.14 (0.41) | 5.2 (0.21)  |                     |           | 0.0082  | 0.0141 |
| EFCAB14 201778.s.at      | 4.68 (0.33) | 3.93 (0.44) |                     |           | 0.0097  | 0.0109 |
| SEC63 201914.s.at*       | 4.8 (0.42)  | 3.86 (0.4)  |                     |           | 0.0076  | 0.0109 |
| SLC25A36 201917.s.at**** | 5.72 (0.51) | 4.56 (0.26) |                     |           | 0.0078  | 0.0139 |
| KIF5B 201991.s.at*       | 6.23 (0.26) | 5.65 (0.22) |                     |           | 0.0068  | 0.0105 |
| SFG7 202104.s.at         | 3.81 (0.37) | 3 (0.41)    |                     |           | 0.0089  | 0.0114 |
| RAP1A 202362.at****      | 5.24 (0.63) | 3.71 (0.39) |                     |           | 0.005   | 0.0101 |
| BASP1 202391.at          | 4.45 (0.64) | 5.86 (0.78) |                     |           | 0.0094  | 0.0114 |
| SEC24B 202798.at*        | 5.4 (0.59)  | 4.15 (0.49) |                     |           | 0.0096  | 0.014  |
| CYTH1 202879.s.at*       | 4.86 (0.6)  | 3.57 (0.52) |                     |           | 0.0094  | 0.0133 |
| RHOBTB3 202975.s.at*     | 3.51 (0.39) | 2.66 (0.32) |                     |           | 0.008   | 0.0125 |
| RREB1 203704.s.at        | 5.44 (0.26) | 4.88 (0.27) |                     |           | 0.0093  | 0.0119 |
| PDE4B 203708.at**        | 6.49 (1.3)  | 3.7 (0.88)  |                     |           | 0.0088  | 0.0145 |
| CSF2RB 205159.at****     | 3.71 (1.2)  | 6.43 (0.6)  |                     |           | 0.0086  | 0.0145 |
| AAK1 205434.s.at         | 5.27 (0.23) | 4.78 (0.26) |                     |           | 0.0094  | 0.0116 |
| CTDSP2 208735.s.at       | 5.36 (0.57) | 4.1 (0.59)  |                     |           | 0.0081  | 0.011  |
| SAP18 208742.s.at*       | 8.38 (0.3)  | 7.73 (0.25) |                     |           | 0.008   | 0.0122 |
| REEP5 208872.s.at**      | 5.51 (0.43) | 4.56 (0.31) |                     |           | 0.0087  | 0.0136 |
| KPNB1 208974.x.at*       | 6 (0.32)    | 5.3 (0.29)  |                     |           | 0.0084  | 0.0124 |
| STX3 209238.at*          | 4.99 (0.79) | 3.21 (0.74) |                     |           | 0.0065  | 0.0104 |
| SAT1 210592.s.at         | 8.45 (0.81) | 6.73 (0.87) |                     |           | 0.0099  | 0.0128 |
| UBR4 211950.at           | 5.79 (0.47) | 4.79 (0.49) |                     |           | 0.01    | 0.013  |
| KBTD2 212447.at***       | 5.58 (0.48) | 4.52 (0.24) |                     |           | 0.0096  | 0.0158 |
| RMND5A 212482.at**       | 5.41 (0.35) | 4.68 (0.24) |                     |           | 0.0099  | 0.0153 |
| DENND5A 212561.at***     | 6.54 (0.47) | 5.47 (0.26) |                     |           | 0.0086  | 0.014  |
| AUTS2 212599.at**        | 5.18 (0.49) | 6.25 (0.36) |                     |           | 0.0082  | 0.0128 |
| DNMBP 212838.at***       | 4.88 (0.6)  | 3.54 (0.38) |                     |           | 0.0081  | 0.0137 |
| GNPTAB 212959.s.at**     | 5.11 (0.64) | 3.71 (0.48) |                     |           | 0.0083  | 0.0132 |
| CASP8 213373.s.at**      | 5.4 (0.92)  | 3.44 (0.61) |                     |           | 0.0096  | 0.0149 |
| POLR2E 213887.s.at*      | 5.22 (0.59) | 3.91 (0.49) |                     |           | 0.0073  | 0.0116 |
| LST1 214181.x.at*        | 5.4 (1.55)  | 2.12 (1.18) |                     |           | 0.0095  | 0.0143 |
| SUB1 214512.s.at****     | 7.6 (0.45)  | 6.49 (0.27) |                     |           | 0.0058  | 0.0105 |
| TBC1D9B 215994.x.at      | 4.99 (0.18) | 4.6 (0.18)  |                     |           | 0.0086  | 0.0114 |
| WDR83OS 217780.at        | 6.35 (0.26) | 5.75 (0.33) |                     |           | 0.0085  | 0.0101 |
| KCMF1 217938.s.at*       | 7.17 (0.36) | 6.4 (0.28)  |                     |           | 0.0084  | 0.0133 |
| NOSIP 217950.at*         | 4.71 (0.23) | 4.19 (0.2)  |                     |           | 0.0069  | 0.0108 |
| BCL2L13 217955.at        | 3.63 (0.57) | 2.36 (0.59) |                     |           | 0.0074  | 0.0104 |
| TSPAN13 217979.at**      | 6.44 (0.67) | 5.02 (0.45) |                     |           | 0.0097  | 0.0158 |
| ZFAND3 218020.s.at*      | 5.17 (0.32) | 4.45 (0.3)  |                     |           | 0.0067  | 0.01   |
| ZDHHC6 218249.at         | 3.81 (0.07) | 3.22 (0.48) |                     |           | 0.0096  | 0.01   |
| NDE1 218414.s.at*        | 5.26 (0.38) | 4.38 (0.33) |                     |           | 0.0064  | 0.0102 |
| PSMG2 218467.at          | 7.49 (0.27) | 6.89 (0.31) |                     |           | 0.0087  | 0.0106 |
| COQ10B 219397.at         | 5.59 (0.39) | 4.74 (0.44) |                     |           | 0.0089  | 0.0114 |
| BNIP3L 221478.at         | 5.37 (0.45) | 4.38 (0.49) |                     |           | 0.0084  | 0.0109 |
| YTHDF3 221749.at*        | 4.97 (0.41) | 4.08 (0.38) |                     |           | 0.008   | 0.0116 |
| FGFR1 222164.at*         | 4.7 (0.28)  | 4.1 (0.26)  |                     |           | 0.0094  | 0.0135 |
| ACTR10 222230.s.at**     | 4.64 (0.5)  | 3.54 (0.4)  |                     |           | 0.008   | 0.0123 |
| PDCD6 222380.s.at*       | 3.35 (0.6)  | 4.66 (0.51) |                     |           | 0.0089  | 0.0127 |
| SAFB2 232099.at*         | 5.42 (0.35) | 4.65 (0.31) |                     |           | 0.007   | 0.011  |
| KDM6B 41387.r.at         | 5.42 (0.33) | 4.69 (0.39) |                     |           | 0.0093  | 0.0113 |

\*among top 500 \*\*among top 300 \*\*\*among top 200 \*\*\*\*among top 100

TABLE 19

The list of 13 additional genes identified by the MCT at 0.01 level of significance based on q-values. The genes selected by sparse PCA among top 500, 300, 200 and 100 are ranked, respectively, from one to four stars.

| Probe Set ID          | BCR-ABL     |             | E2A-rearranged (EP) |           | p-values |        |
|-----------------------|-------------|-------------|---------------------|-----------|----------|--------|
|                       | mean (sd)   | mean (sd)   | mean (sd)           | mean (sd) | MCT      | Welch  |
| STARD7 200028.s.at*** | 6.41 (0.15) | 5.47 (0.3)  |                     |           | 0.009    | 0.0151 |
| SH3GL1 201851.at**    | 5.25 (0.16) | 4.34 (0.29) |                     |           | 0.0097   | 0.0172 |
| ABL1 202123.s.at****  | 6.85 (0.36) | 4.6 (0.61)  |                     |           | 0.009    | 0.0142 |
| TMEM11 203437.at      | 5.12 (0.09) | 4.07 (0.31) |                     |           | 0        | 0.014  |
| ADD3 205882.x.at      | 5.39 (0.16) | 4.21 (0.32) |                     |           | 0.0097   | 0.0131 |
| CD164 208405.s.at*    | 6.96 (0.19) | 5.58 (0.36) |                     |           | 0.0097   | 0.0131 |
| CCT5 208696.at        | 5.51 (0.04) | 4.6 (0.26)  |                     |           | 0.0097   | 0.0142 |
| TAPBP 208829.at       | 7.37 (0.12) | 6.47 (0.3)  |                     |           | 0        | 0.0147 |
| RNF139 209510.at      | 6.8 (0.14)  | 5.92 (0.26) |                     |           | 0.0097   | 0.0142 |
| NUP98 210793.s.at*    | 5.55 (0.09) | 4.5 (0.32)  |                     |           | 0        | 0.0142 |
| XPO6 211982.x.at***   | 5.65 (0.09) | 5.03 (0.16) |                     |           | 0        | 0.0131 |
| KDM3A 212689.s.at*    | 6.41 (0.06) | 5.84 (0.18) |                     |           | 0.0097   | 0.0142 |
| UBP1 218082.s.at****  | 4.97 (0.18) | 3.89 (0.23) |                     |           | 0.009    | 0.0142 |

\*among top 500 \*\*among top 300 \*\*\*among top 200 \*\*\*\*among top 100

TABLE 20

The list of 13 additional genes identified by the MCT at 0.01 level of significance based on  $q$ -values. The genes selected by sparse PLS-DA among top 500, 300, 200 and 100 are ranked, respectively, from one to four stars.

| Probe Set ID           | BCR-ABL     | E2A-rearranged (EP) | p-value |        |
|------------------------|-------------|---------------------|---------|--------|
|                        | mean (sd)   | mean (sd)           | MCT     | Welch  |
| STARD7 200028_s.at**** | 6.41 (0.15) | 5.47 (0.3)          | 0.009   | 0.0151 |
| SH3GL1 201851.at****   | 5.25 (0.16) | 4.34 (0.29)         | 0.0097  | 0.0172 |
| ABL1 202123_s.at****   | 6.85 (0.36) | 4.6 (0.61)          | 0.009   | 0.0142 |
| TMEM11 203437.at****   | 5.12 (0.09) | 4.07 (0.31)         | 0       | 0.014  |
| ADD3 205882_x.at****   | 5.39 (0.16) | 4.21 (0.32)         | 0.0097  | 0.0131 |
| CD164 208405_s.at****  | 6.96 (0.19) | 5.58 (0.36)         | 0.0097  | 0.0131 |
| CCT5 208696.at****     | 5.51 (0.04) | 4.6 (0.26)          | 0.0097  | 0.0142 |
| TAPBP 208829.at****    | 7.37 (0.12) | 6.47 (0.3)          | 0       | 0.0147 |
| RNF139 209510.at****   | 6.8 (0.14)  | 5.92 (0.26)         | 0.0097  | 0.0142 |
| NUP98 210793_s.at****  | 5.55 (0.09) | 4.5 (0.32)          | 0       | 0.0142 |
| XPO6 211982_x.at****   | 5.65 (0.09) | 5.03 (0.16)         | 0       | 0.0131 |
| KDM3A 212689_s.at****  | 6.41 (0.06) | 5.84 (0.18)         | 0.0097  | 0.0142 |
| UBP1 218082_s.at****   | 4.97 (0.18) | 3.89 (0.23)         | 0.009   | 0.0142 |

\*among top 500 \*\*among top 300 \*\*\*among top 200 \*\*\*\*among top 100
